# Supplementary material for: Y(OTf)3-Salazin-Catalyzed Asymmetric Aldol Condensation
Source: MDPI journal article supplement (doi:10.3390/molecules29091963), 2024-04-25
Supplement: s1 [file s1]

# Supporting Information

## Y(OTf)<sub>3</sub>-Salazin-Catalyzed Asymmetric Aldol Condensation

Chengzhuo Wang, Ning Chen, Zhanhui Yang and Jiayi Xu\*

State Key Laboratory of Chemical Resource Engineering, Department of Organic Chemistry,  
College of Chemistry, Beijing University of Chemical Technology, Beijing 100029, China \*  
Correspondence: jxxu@mail.buct.edu.cn; Tel./Fax: +86-10-6443-5565

### Contents

1. Copies of NMR and HRMS spectra of products.....S2
2. Copies of HPLC profiles of products.....S21

## 1. Copies of NMR and HRMS spectra of products

### (*R*)-4-Hydroxy-4-(4-nitrophenyl)butan-2-one (3a)

$^1\text{H}$  NMR (400 MHz,  $\text{CDCl}_3$ )

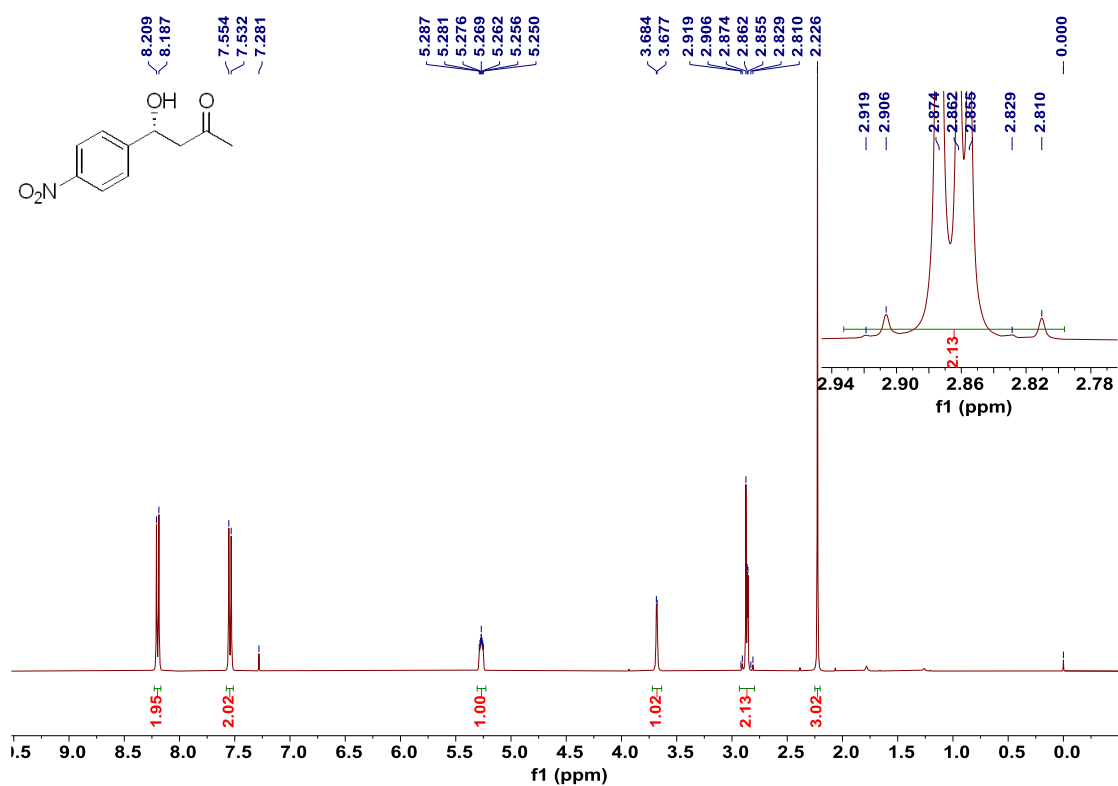

$^{13}\text{C}\{^1\text{H}\}$  NMR (101 MHz,  $\text{CDCl}_3$ )

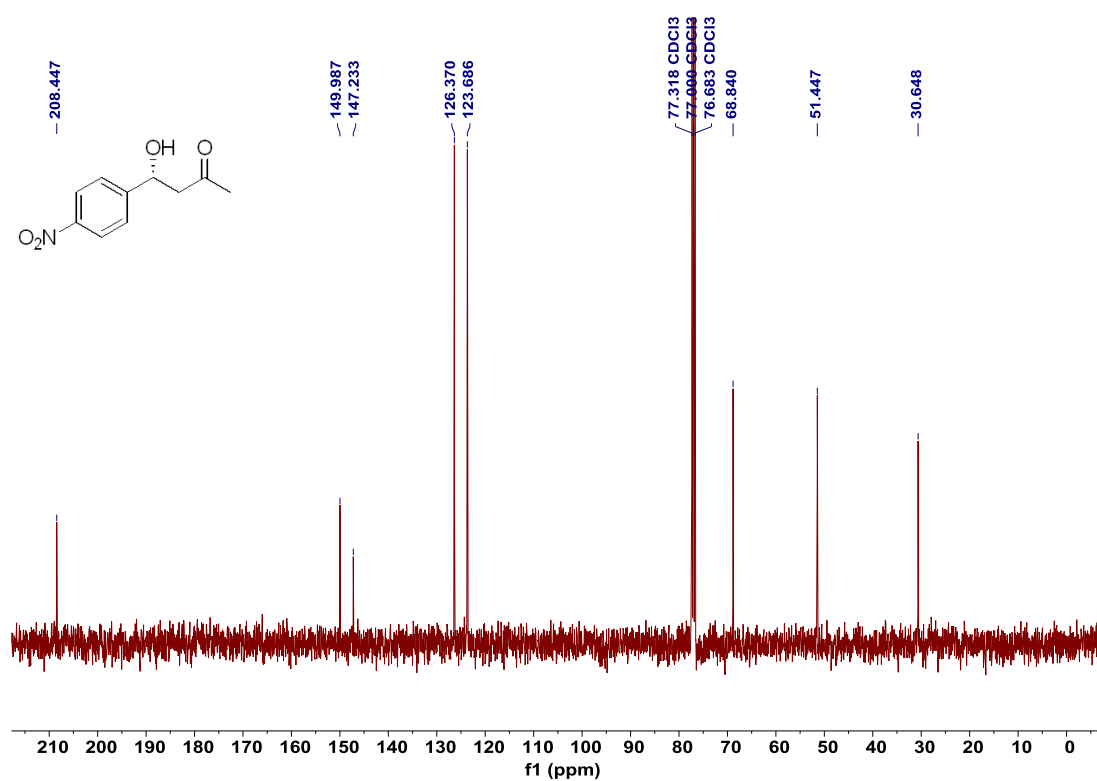

**(R)-4-Hydroxy-4-(3-nitrophenyl)butan-2-one (3b)**

$^1\text{H}$  NMR (400 MHz,  $\text{CDCl}_3$ )

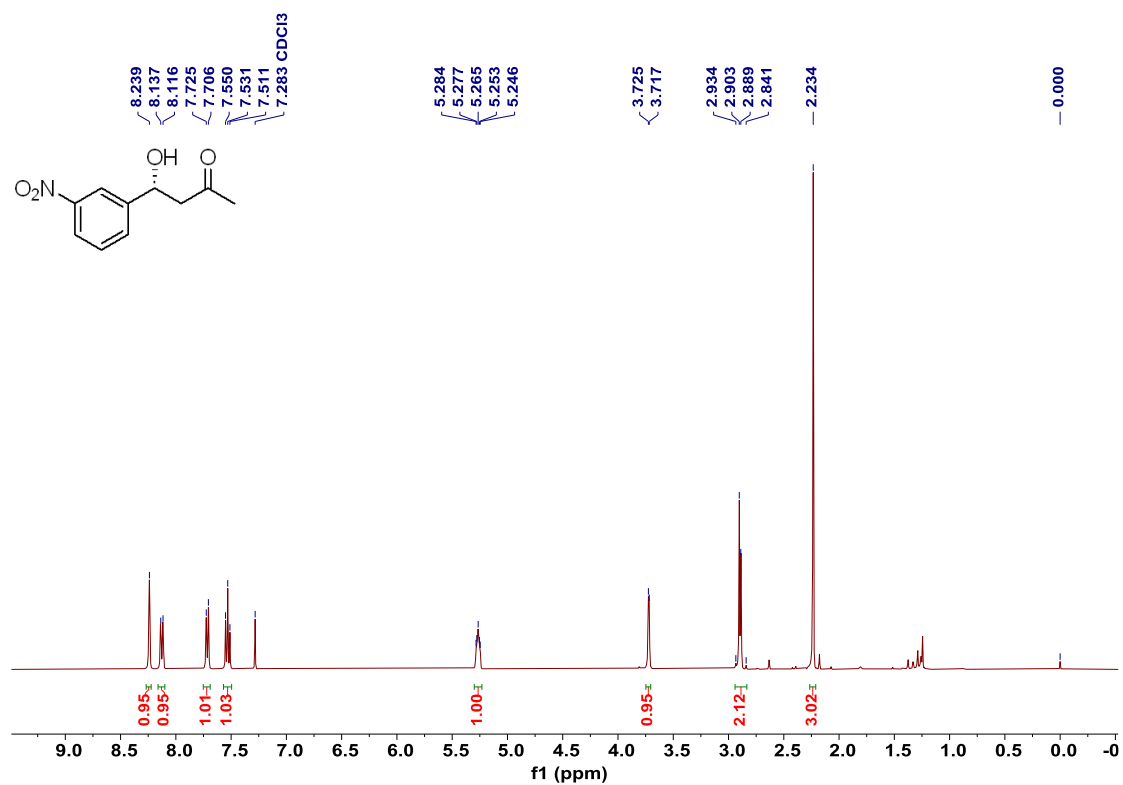

$^{13}\text{C}\{^1\text{H}\}$  NMR (101 MHz,  $\text{CDCl}_3$ )

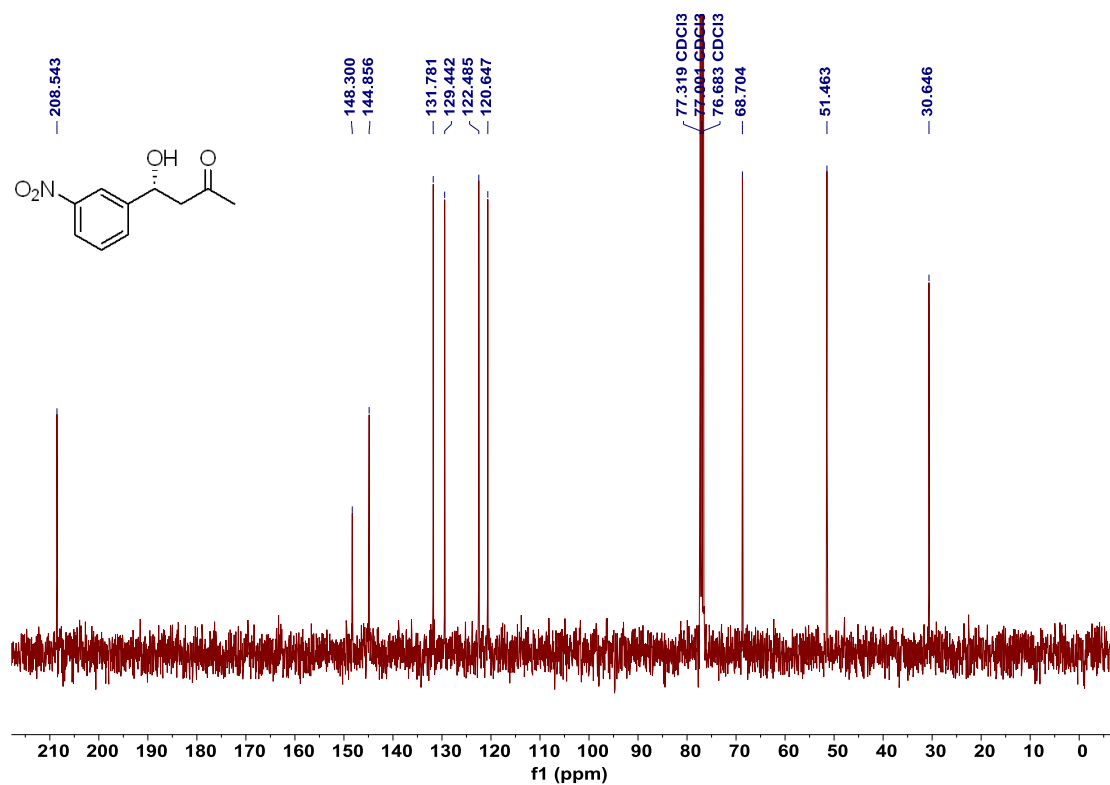

**(R)-4-Hydroxy-4-(2-nitrophenyl)butan-2-one (3c)**

$^1\text{H}$  NMR (400 MHz,  $\text{CDCl}_3$ )

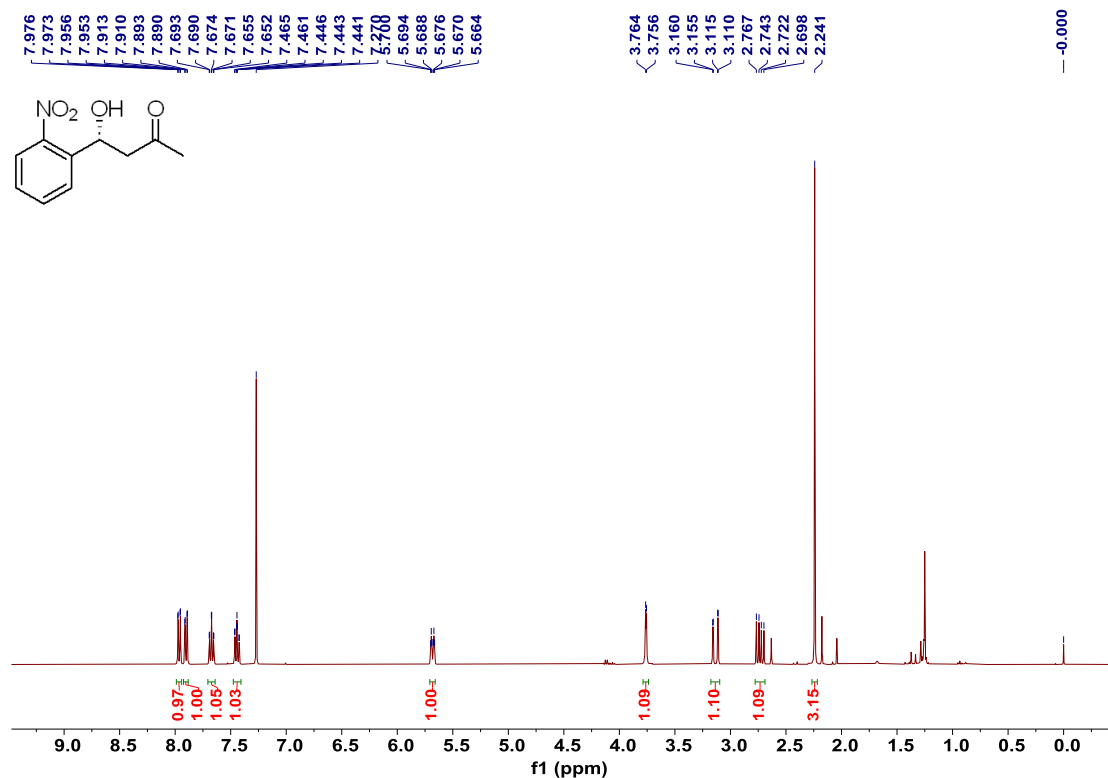

$^{13}\text{C}\{^1\text{H}\}$  NMR (101 MHz,  $\text{CDCl}_3$ )

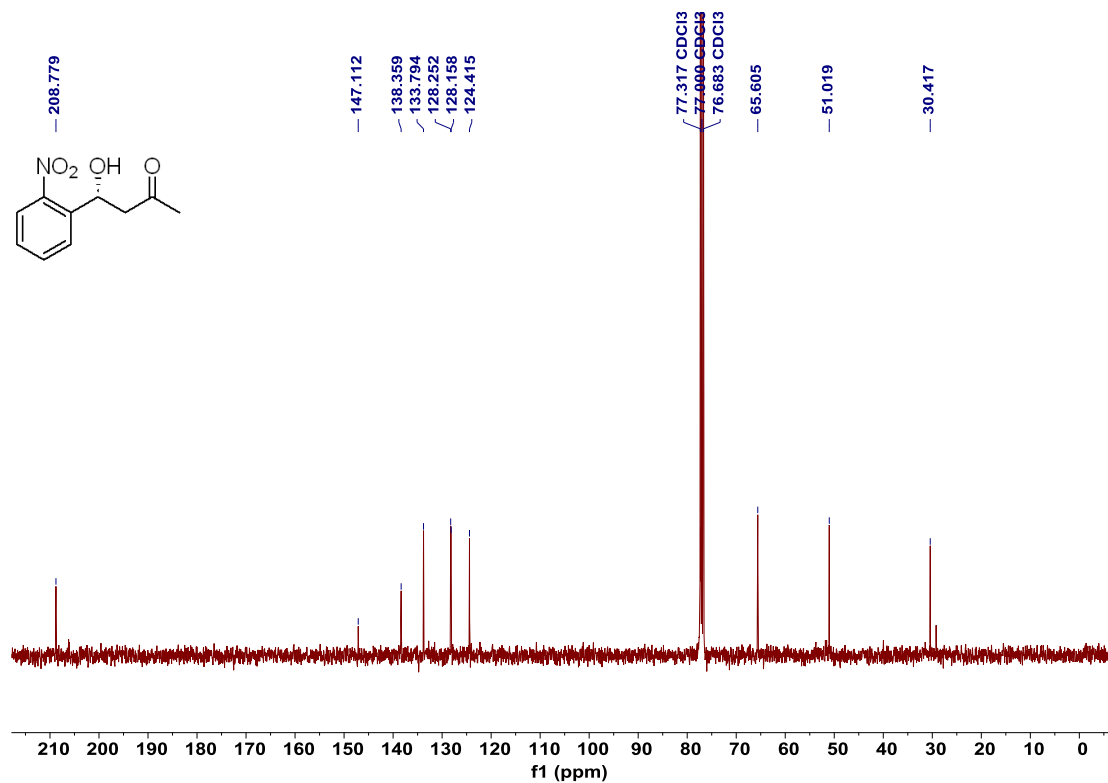

**(R)-4-Hydroxy-4-(4-isocyanophenyl)butan-2-one (3d)**

$^1\text{H}$  NMR (400 MHz,  $\text{CDCl}_3$ )

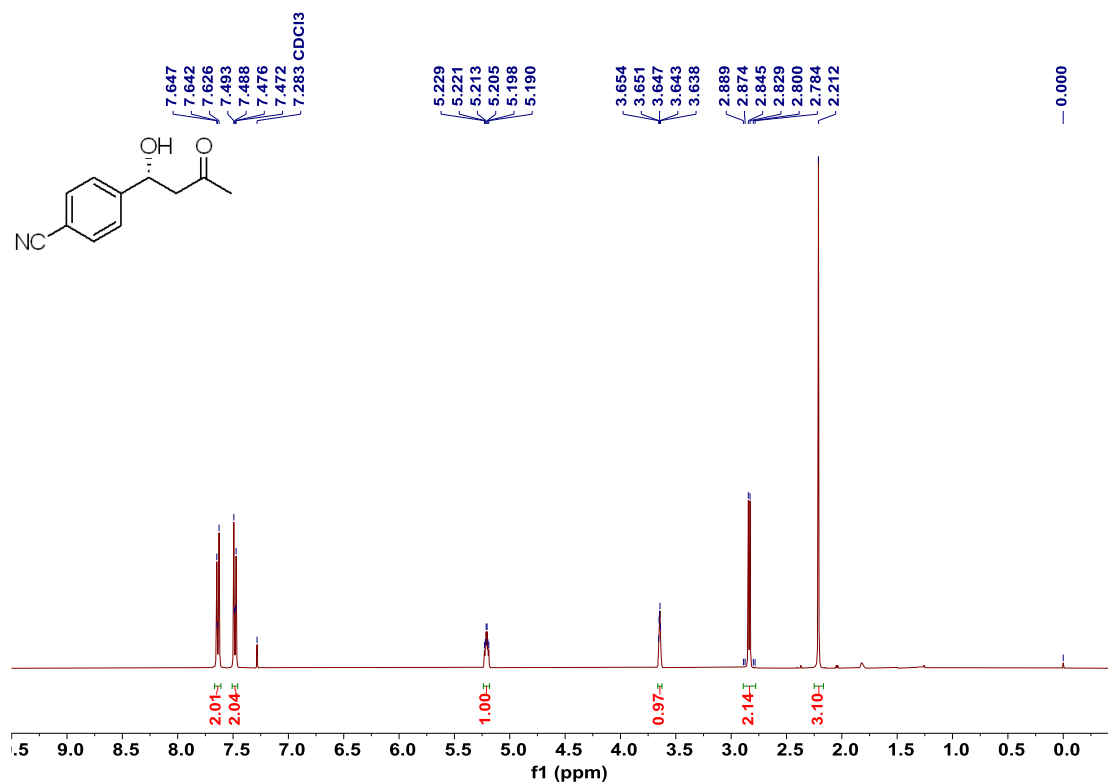

$^{13}\text{C}\{^1\text{H}\}$  NMR (101 MHz,  $\text{CDCl}_3$ )

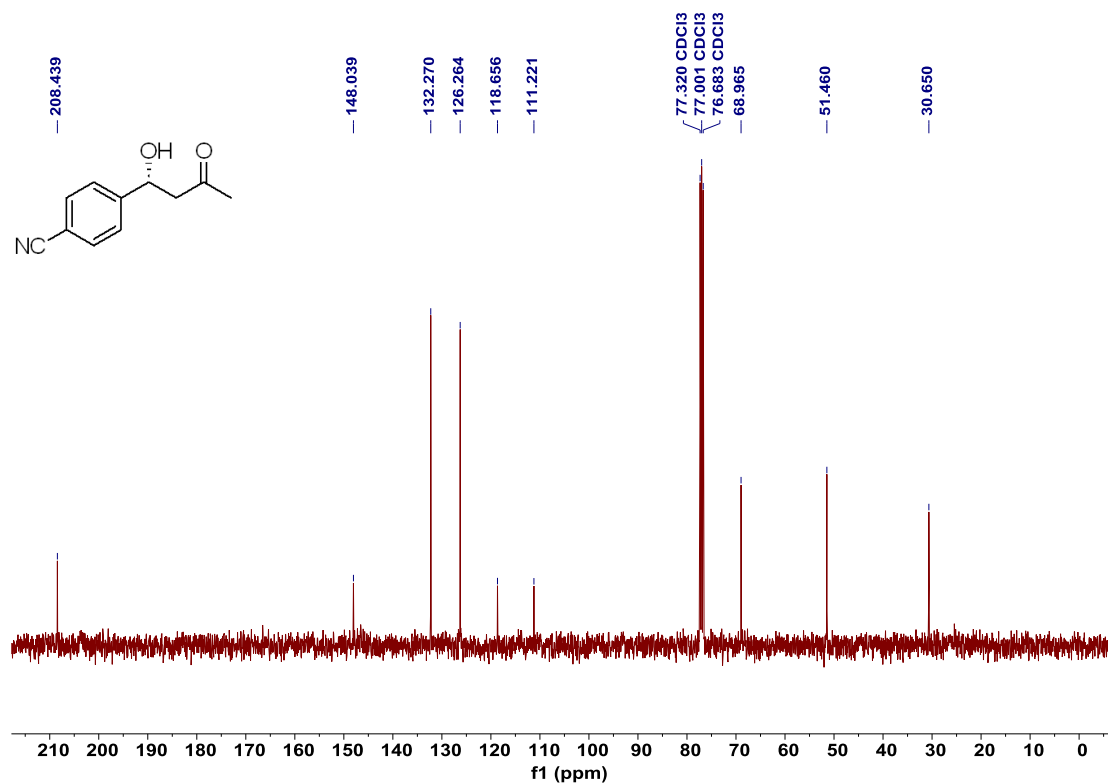

**(*R*)-4-(4-Chlorophenyl)-4-hydroxybutan-2-one (3e)**

$^1\text{H}$  NMR (400 MHz,  $\text{CDCl}_3$ )

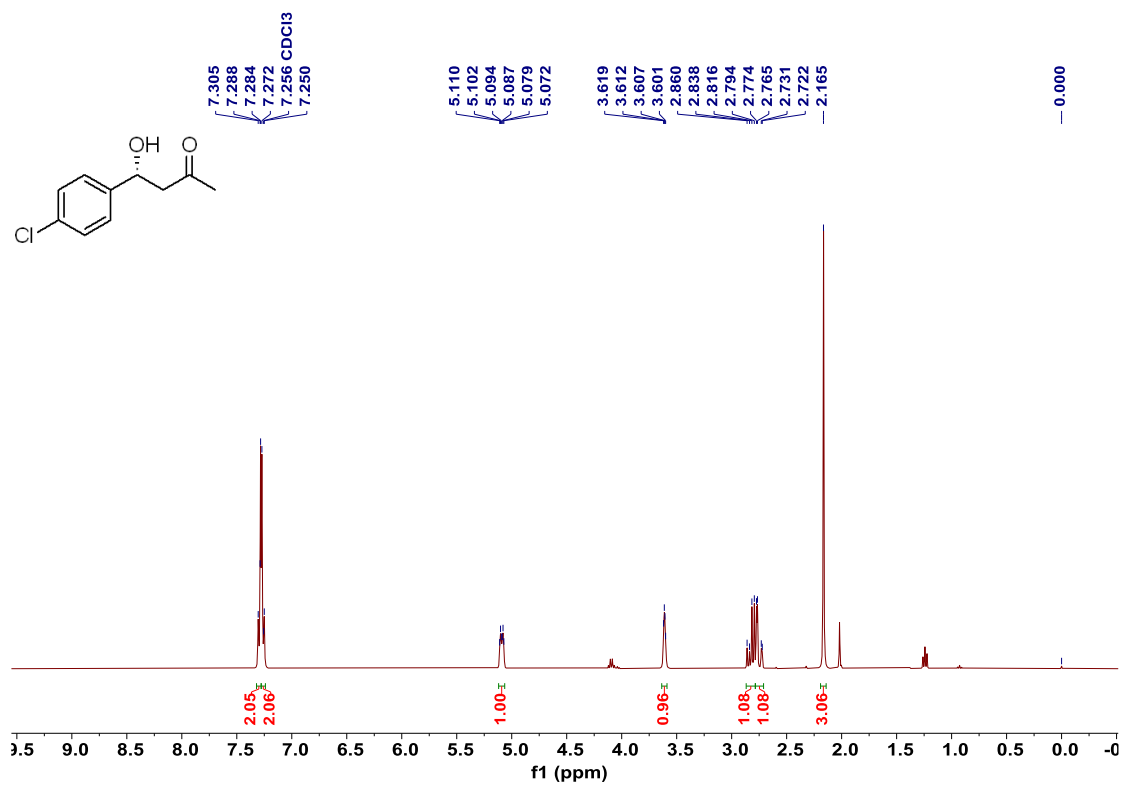

$^{13}\text{C}\{^1\text{H}\}$  NMR (101 MHz,  $\text{CDCl}_3$ )

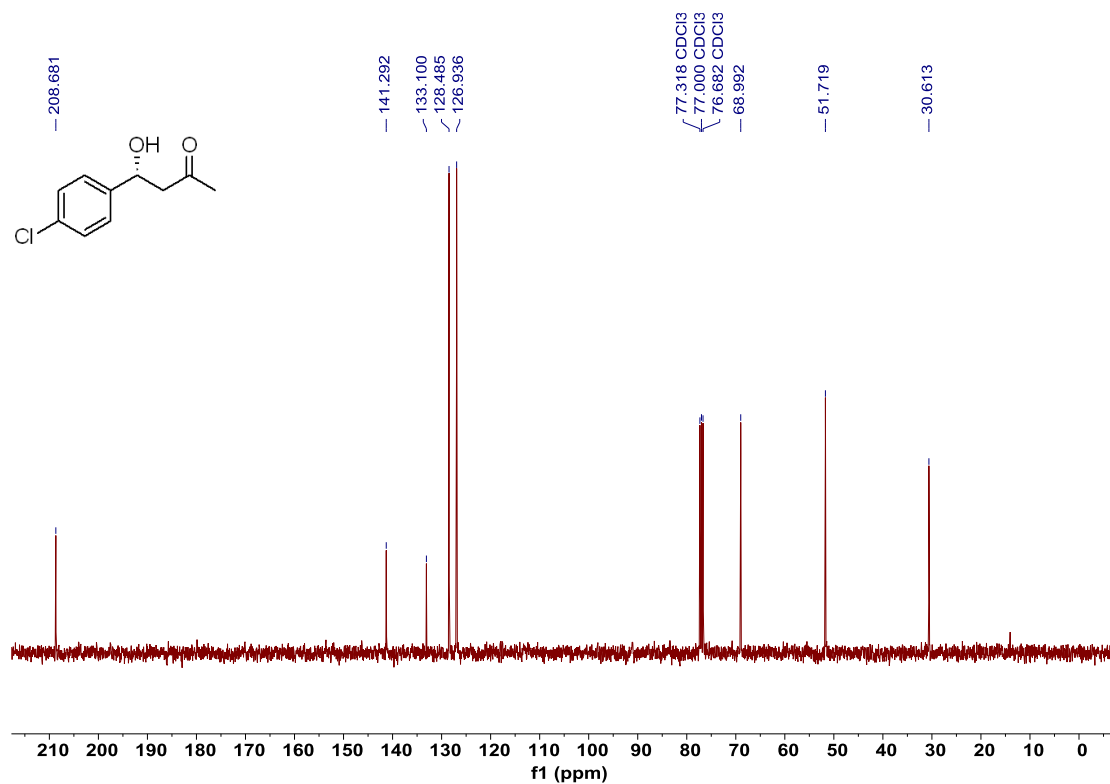

**(R)-4-(4-Chlorophenyl)-4-hydroxybutan-2-one (3f)**

$^1\text{H}$  NMR (400 MHz,  $\text{CDCl}_3$ )

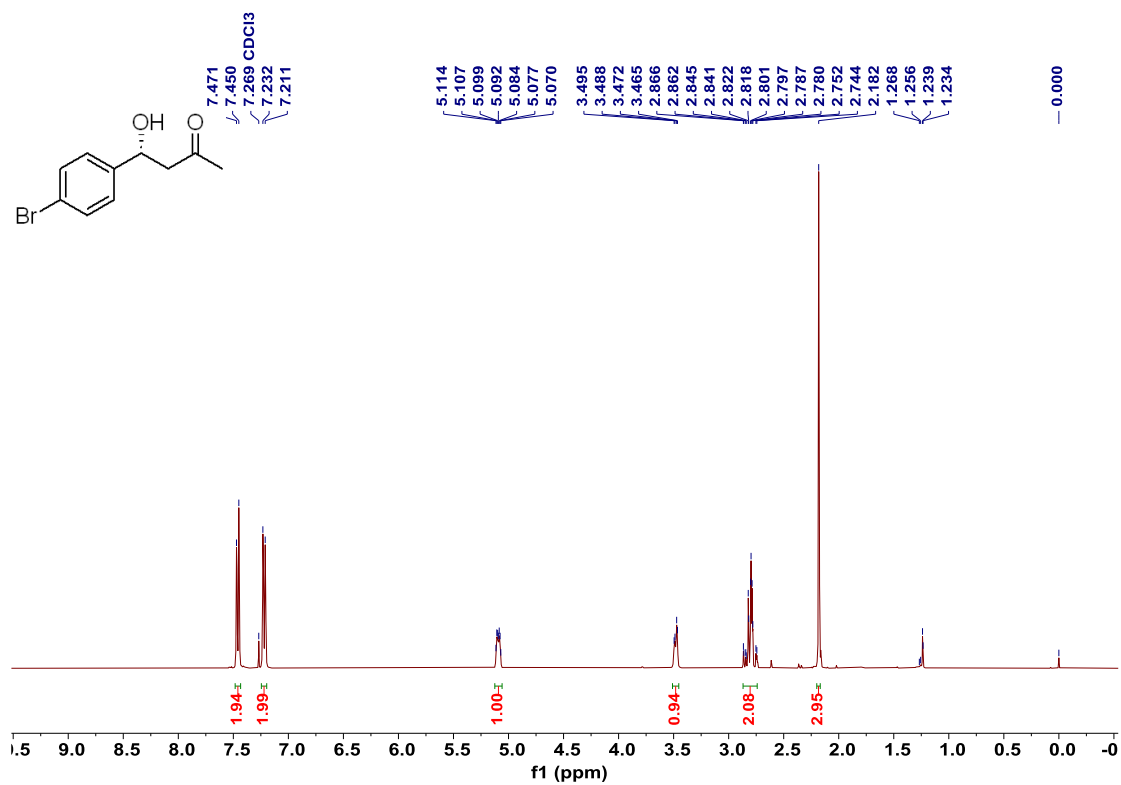

$^{13}\text{C}\{^1\text{H}\}$  NMR (101 MHz,  $\text{CDCl}_3$ )

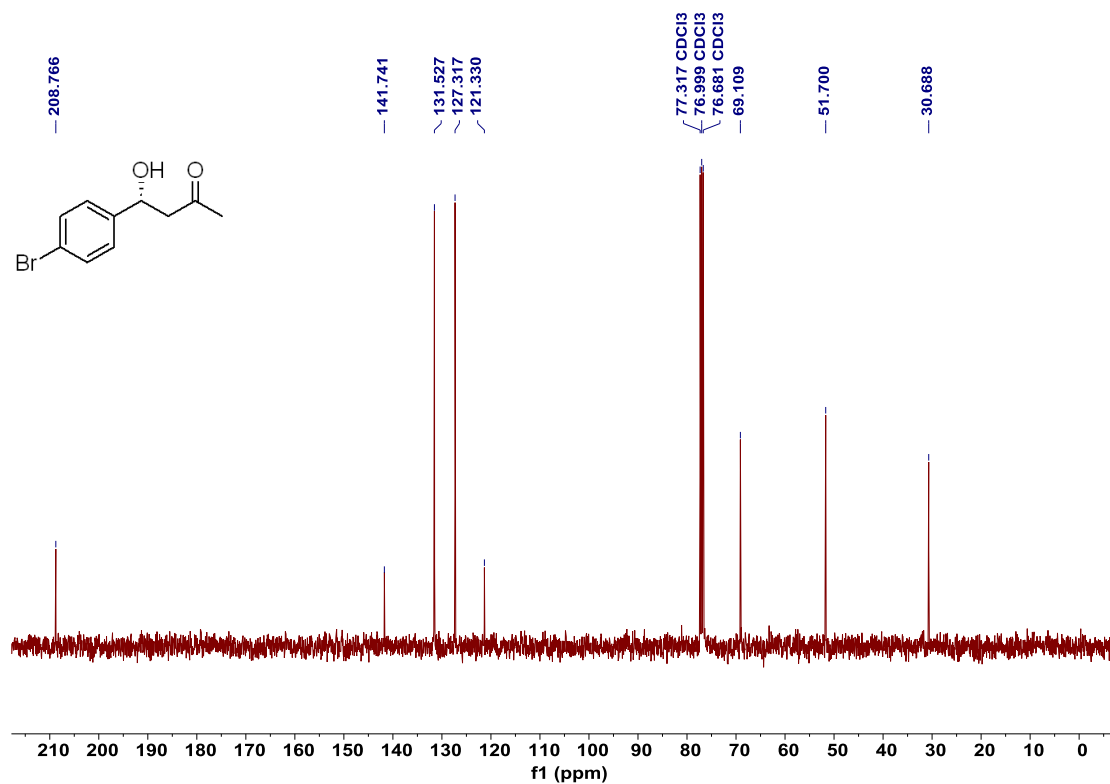

**(R)-4-Hydroxy-4-(naphthalen-1-yl)butan-2-one (3j)**

$^1\text{H}$  NMR (400 MHz,  $\text{CDCl}_3$ )

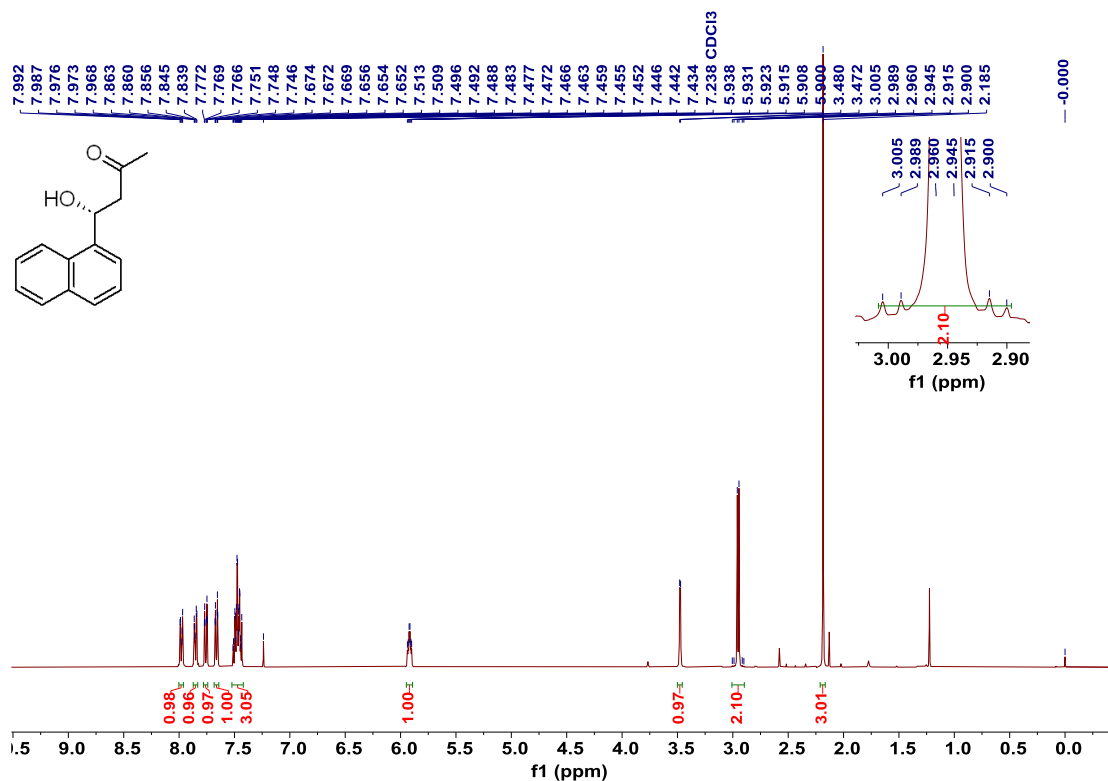

$^{13}\text{C}\{^1\text{H}\}$  NMR (101 MHz,  $\text{CDCl}_3$ )

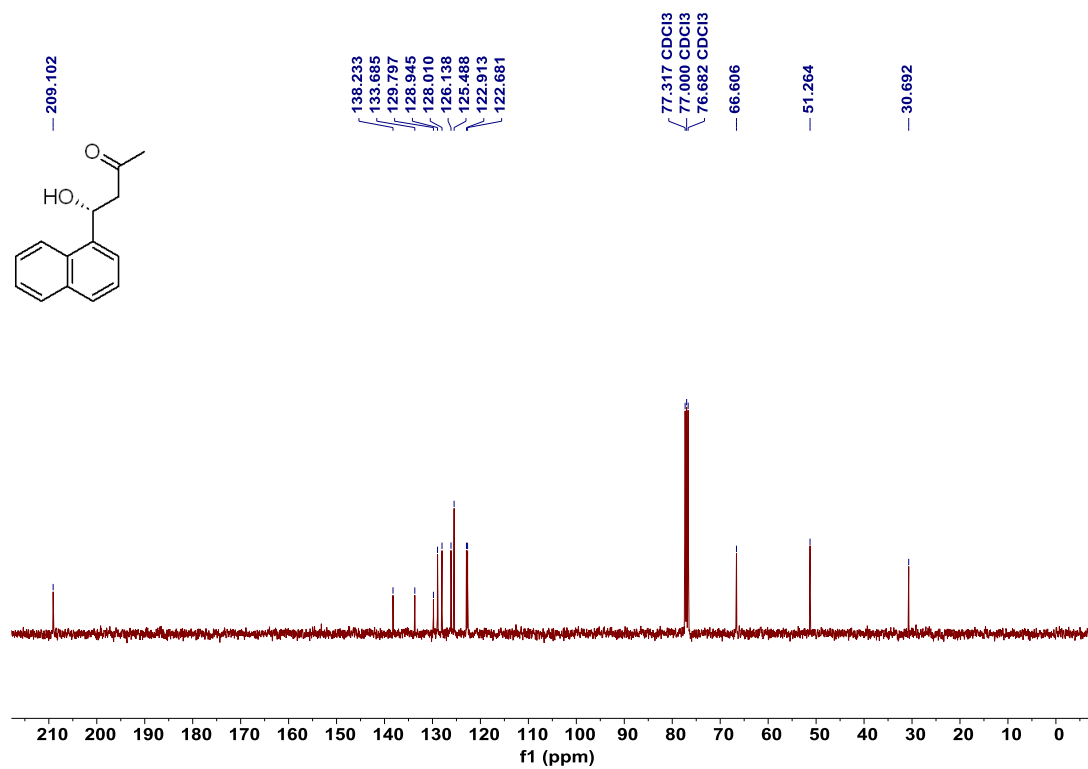



**(R)-4-hydroxy-4-(naphthalen-2-yl)butan-2-one (3k)**

$^1\text{H}$  NMR (400 MHz,  $\text{CDCl}_3$ )

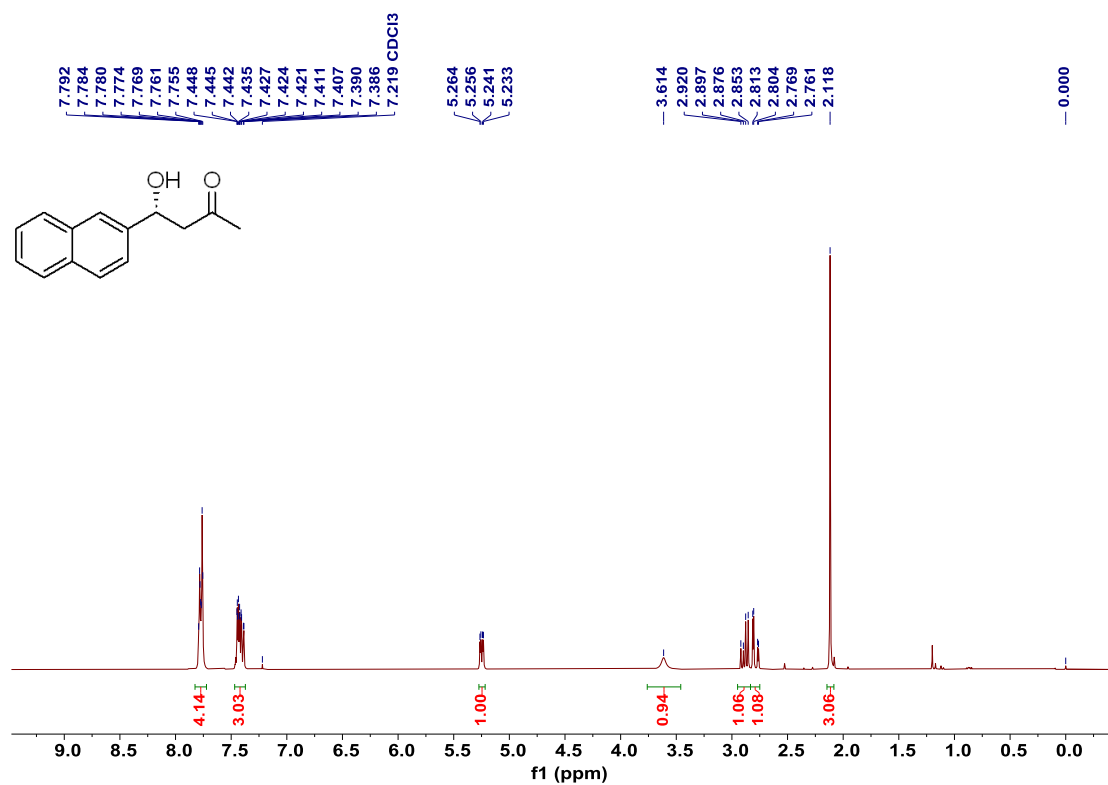

$^{13}\text{C}\{^1\text{H}\}$  NMR (101 MHz,  $\text{CDCl}_3$ )

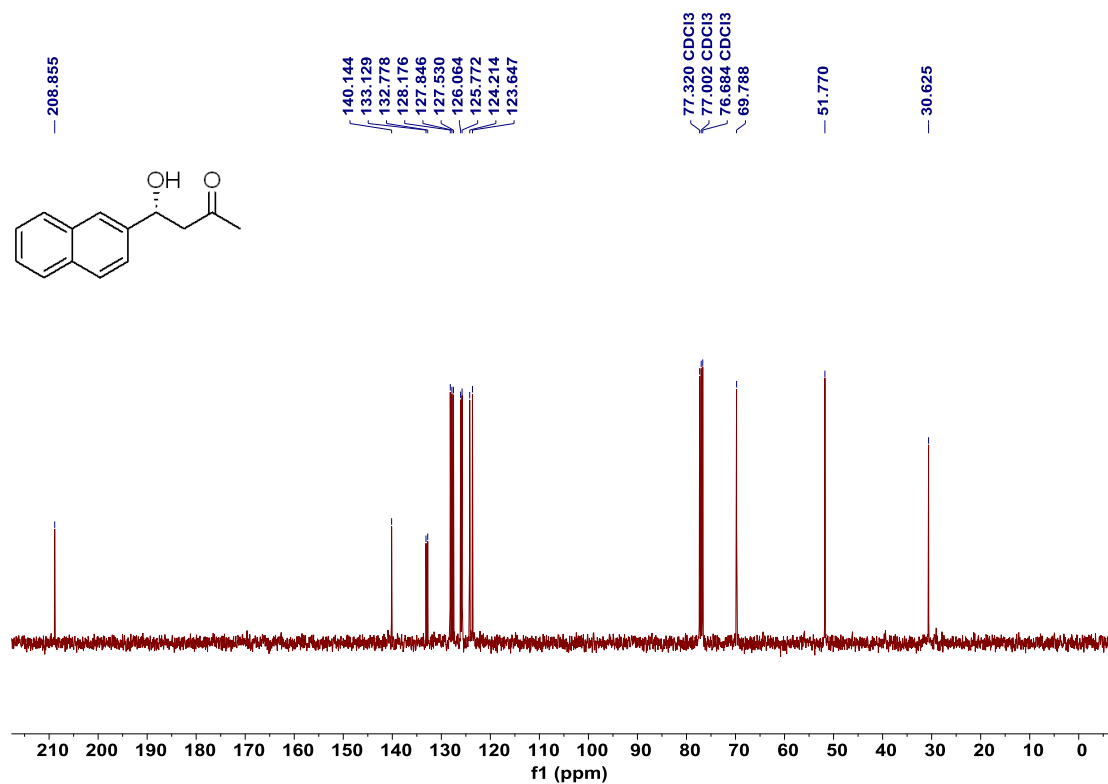

**(*R*)-4-Hydroxy-4-(quinolin-4-yl)butan-2-one (3l)**

$^1\text{H}$  NMR (400 MHz,  $\text{CDCl}_3$ )

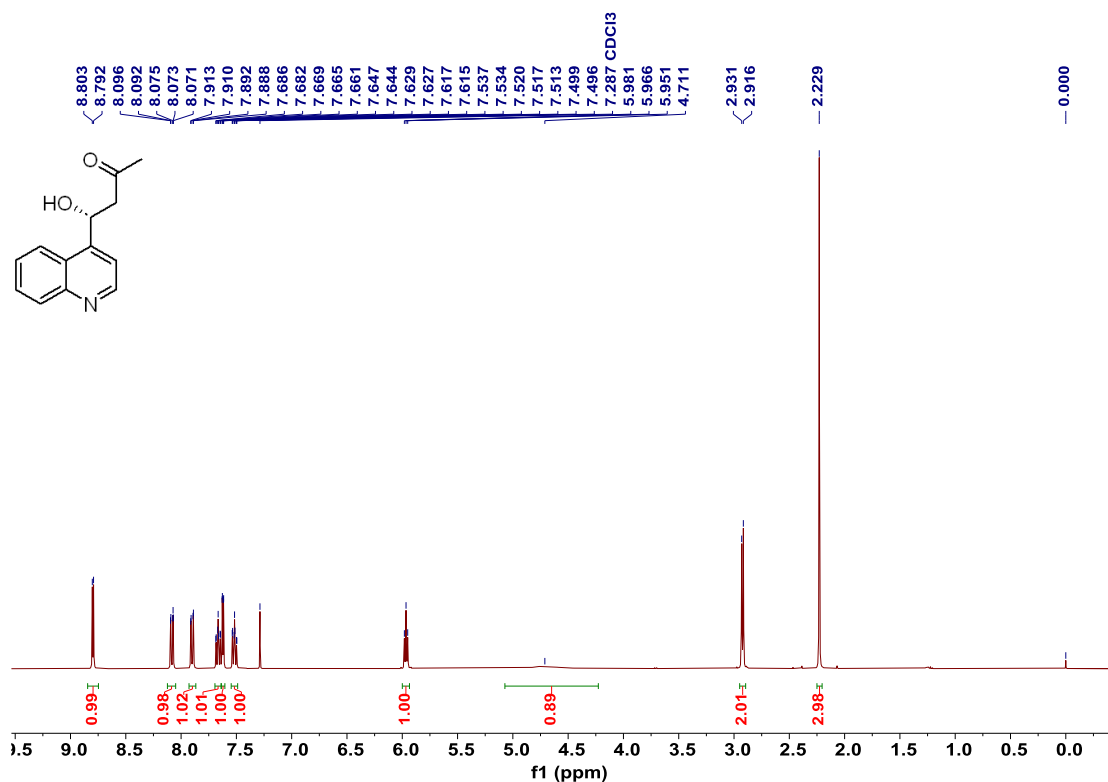

$^{13}\text{C}\{^1\text{H}\}$  NMR (101 MHz,  $\text{CDCl}_3$ )

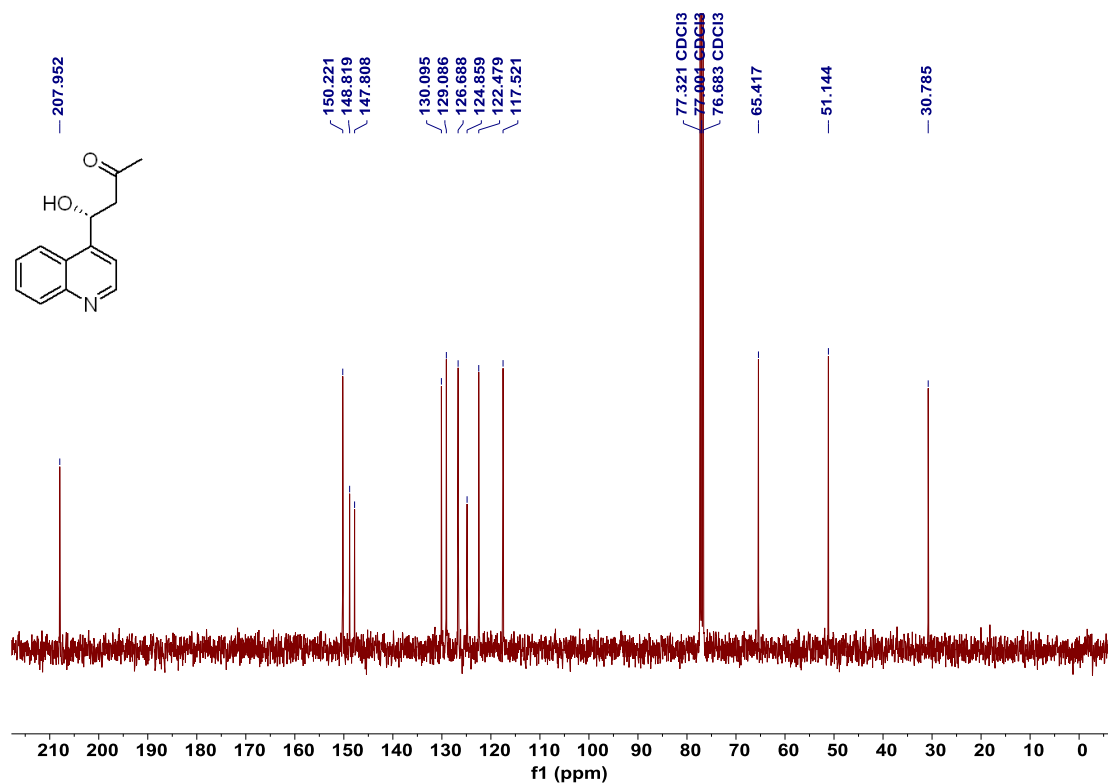

**(R)-4-Hydroxy-4-(4-(methylsulfonyl)phenyl)butan-2-one (3m)**

$^1\text{H}$  NMR (400 MHz,  $\text{CDCl}_3$ )

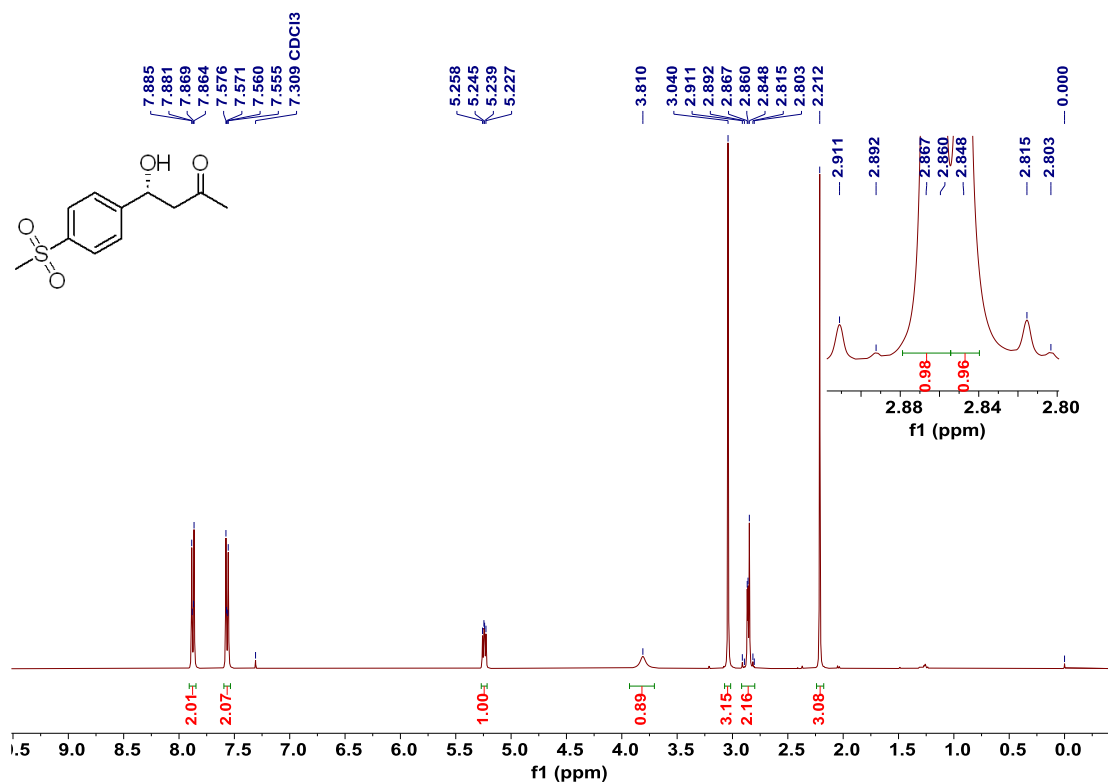

$^{13}\text{C}\{^1\text{H}\}$  NMR (101 MHz,  $\text{CDCl}_3$ )

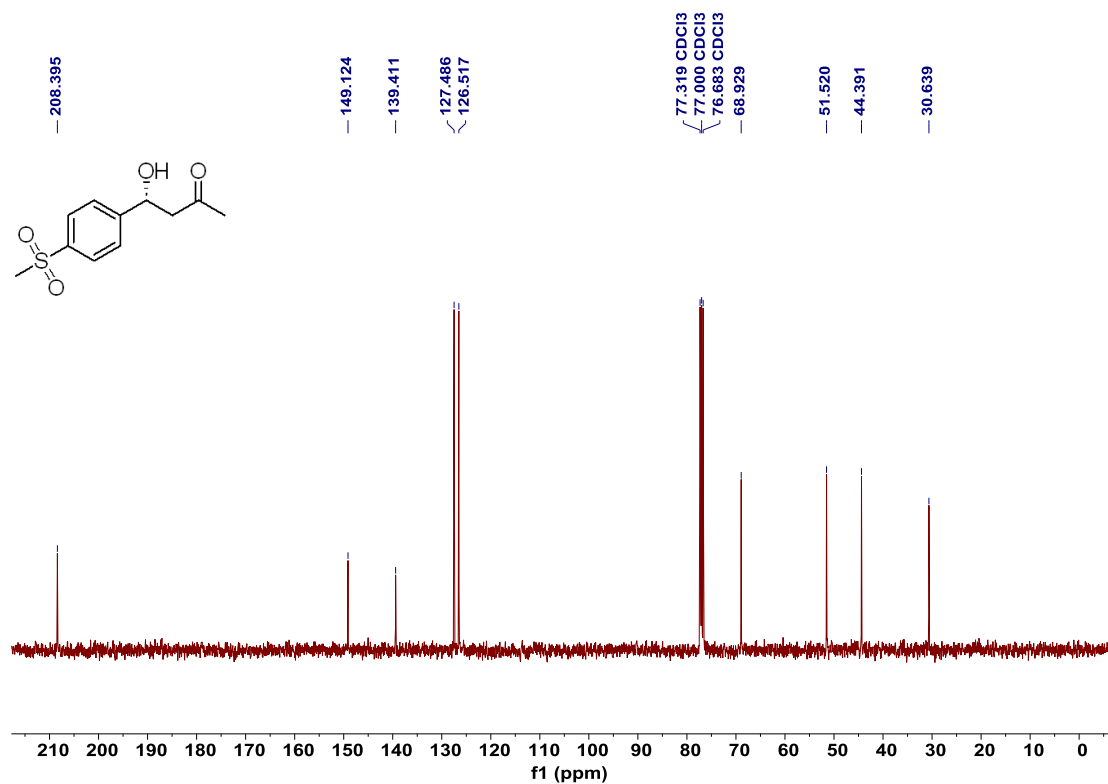

HRMS (ESI):  $m/z$  calcd for  $C_{11}H_{14}NaO_4S^+[M+Na]^+$ : 265.0505, found: 265.0513.

### C8\_WATER\_ACN

20240327-wcz-pos 78 (0.318)

1: TOF MS ES+  
2.89e3

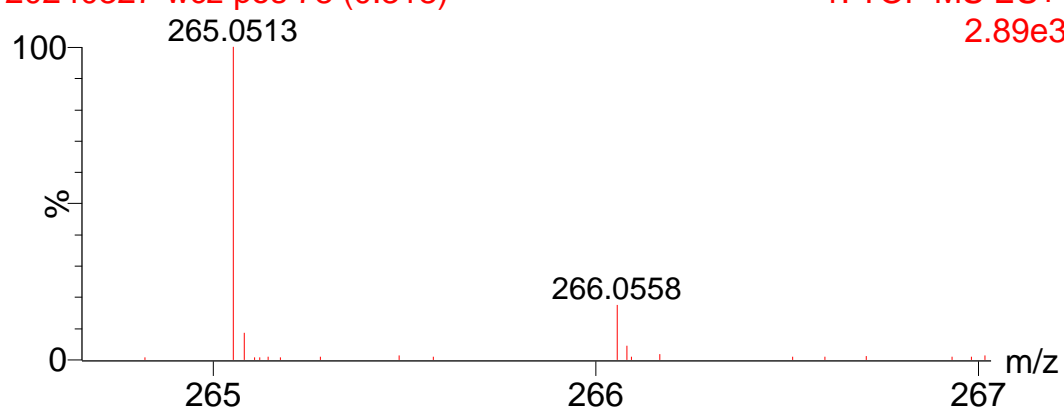

**(E)-4-(4-(Methylsulfonyl)phenyl)but-3-en-2-one (4m)**

$^1\text{H}$  NMR (400 MHz,  $\text{CDCl}_3$ )

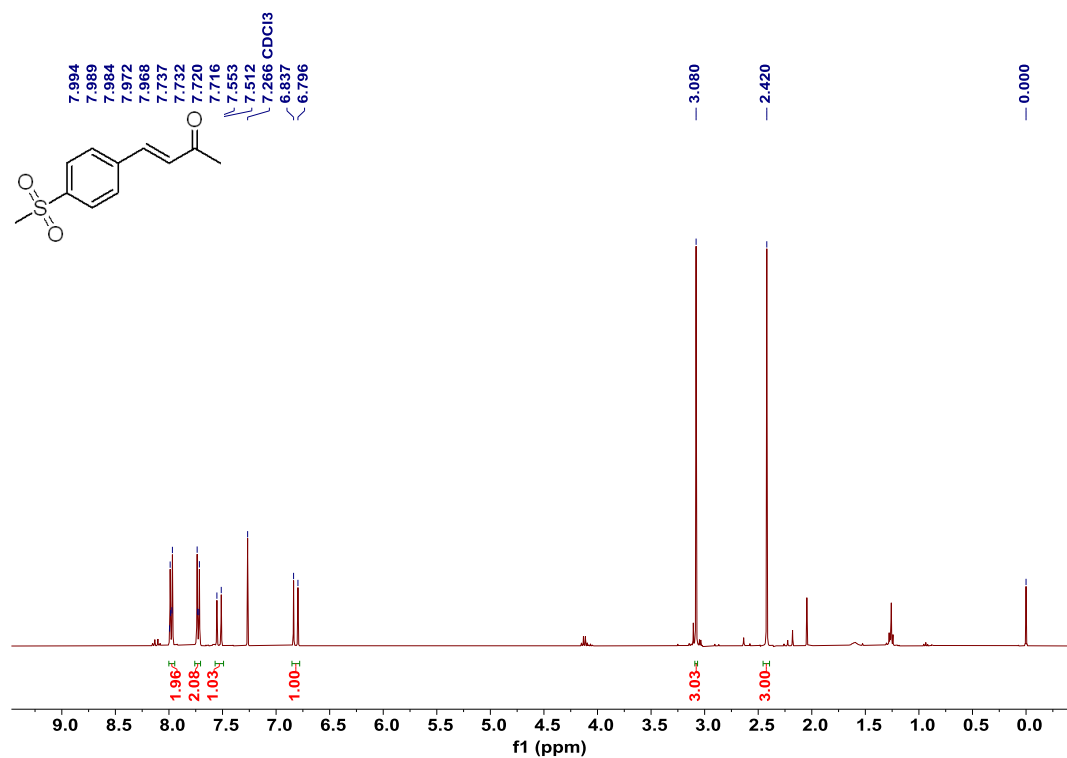

$^{13}\text{C}\{^1\text{H}\}$  NMR (101 MHz,  $\text{CDCl}_3$ )

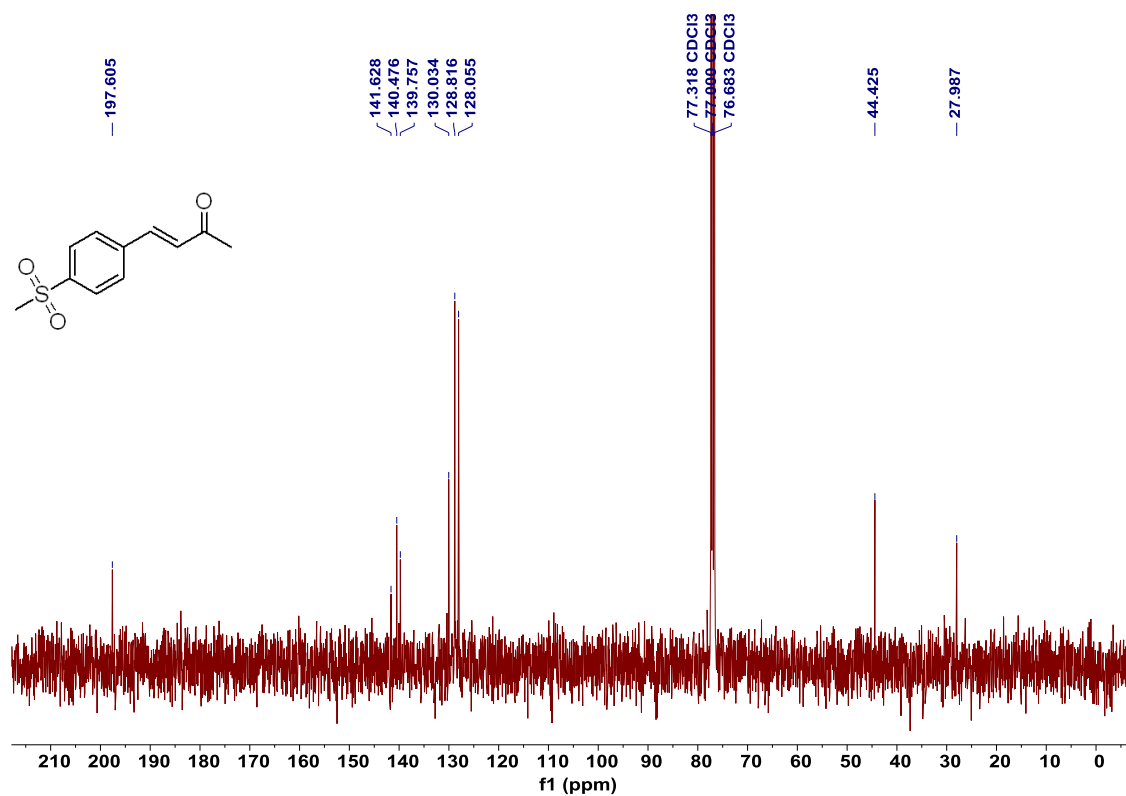

**(*R*)-4-Hydroxy-4-(4-(4,4,5,5-tetramethyl-1,3,2-dioxaborolan-2-yl)phenyl)butan-2-one (3n)**

$^1\text{H}$  NMR (400 MHz,  $\text{CDCl}_3$ )

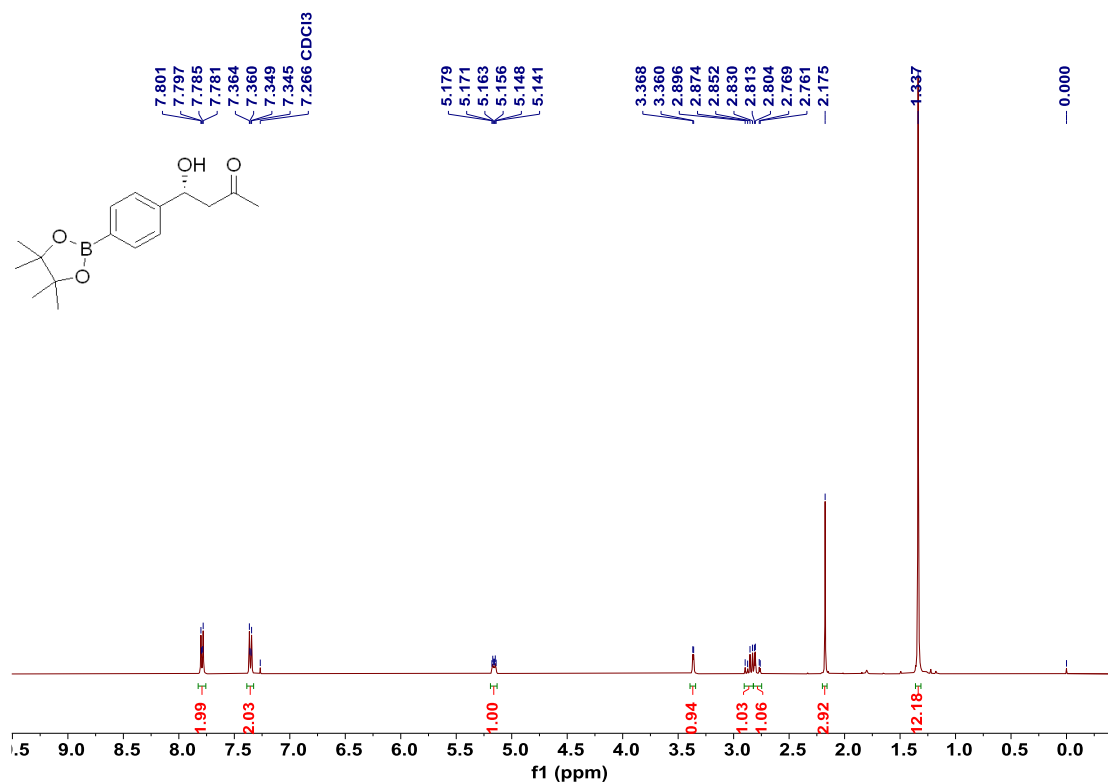

$^{13}\text{C}\{^1\text{H}\}$  NMR (101 MHz,  $\text{CDCl}_3$ )

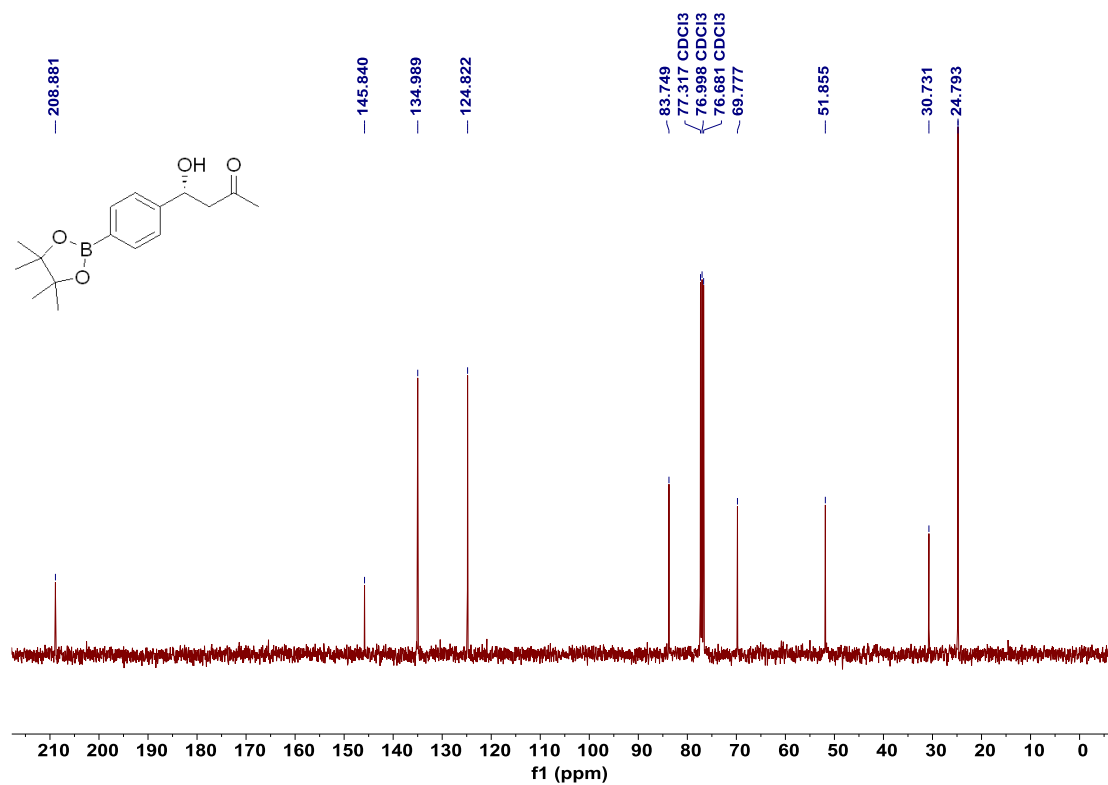

HRMS (ESI):  $m/z$  calcd for  $C_{16}H_{23}BNaO_4^+ [M+Na]^+$ : 313.1582, found: 313.1585.

### C8\_WATER\_ACN

20240327-wcz-pos 78 (0.318)

1: TOF MS ES+  
1.42e4

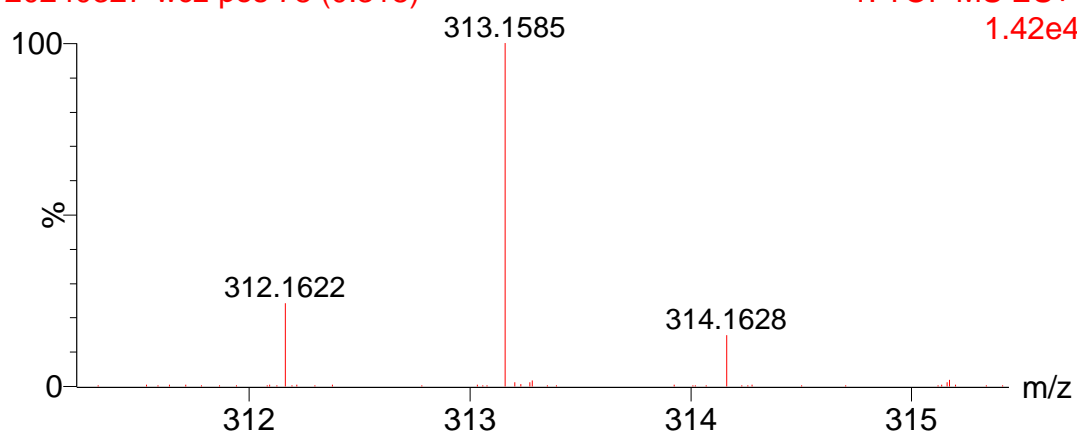

**(S)-2-((R/S)-Hydroxy(4-nitrophenyl)methyl)cyclobutan-1-one (5a)**

*anti:syn* = 57:43, ee of *anti* 83%.

<sup>1</sup>H NMR (400 MHz, CDCl<sub>3</sub>)

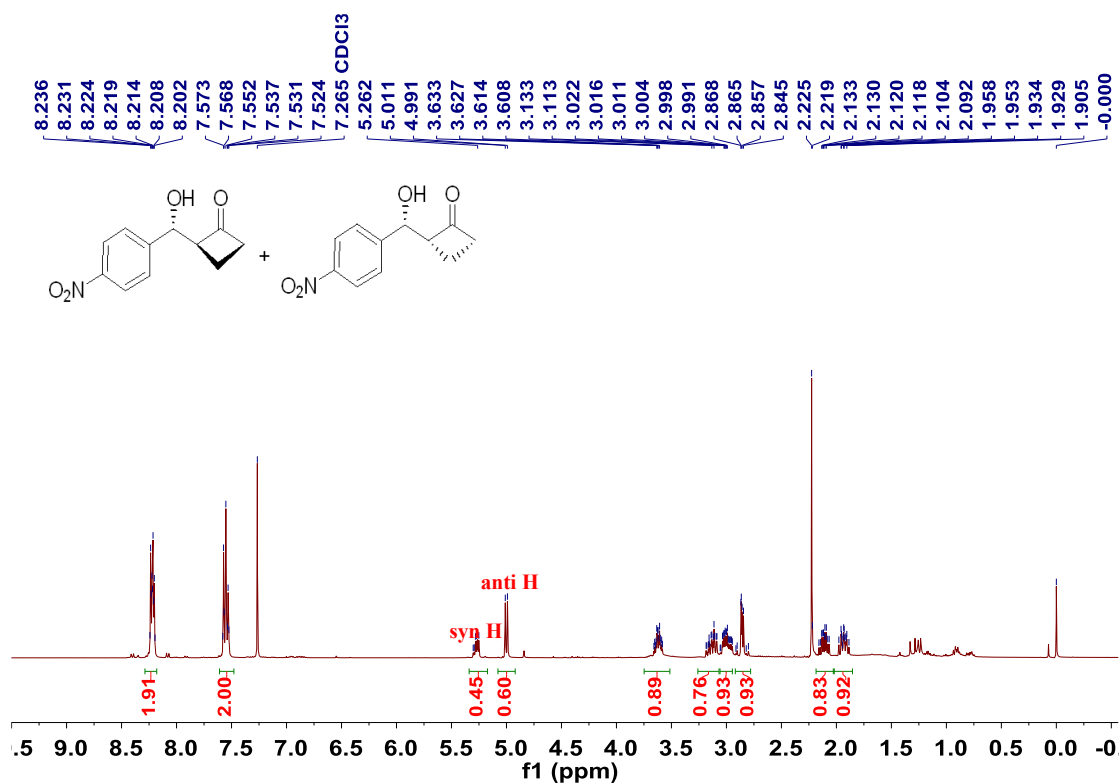

<sup>13</sup>C{<sup>1</sup>H} NMR (101 MHz, CDCl<sub>3</sub>)

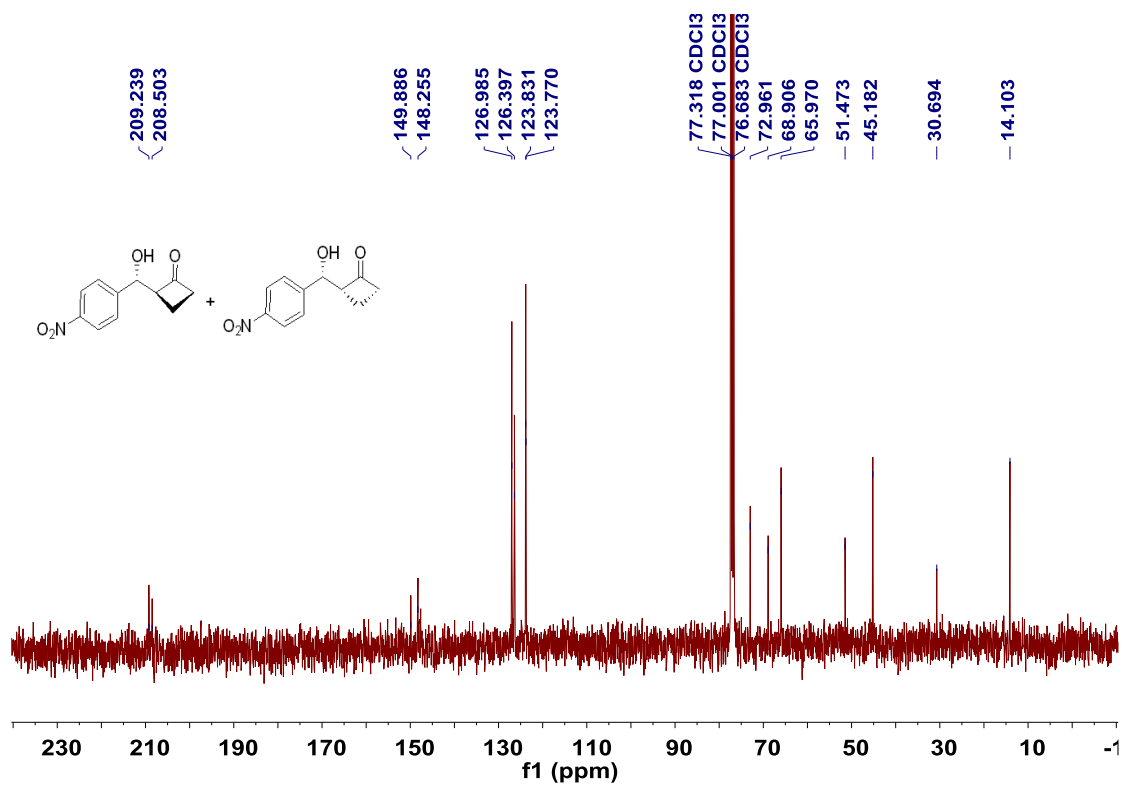



**(S)-2-((R)-Hydroxy(4-nitrophenyl)methyl)cyclopentan-1-one (5b)**

*anti:syn* = 83:17, ee of *anti* 96%

$^1\text{H}$  NMR (400 MHz,  $\text{CDCl}_3$ )

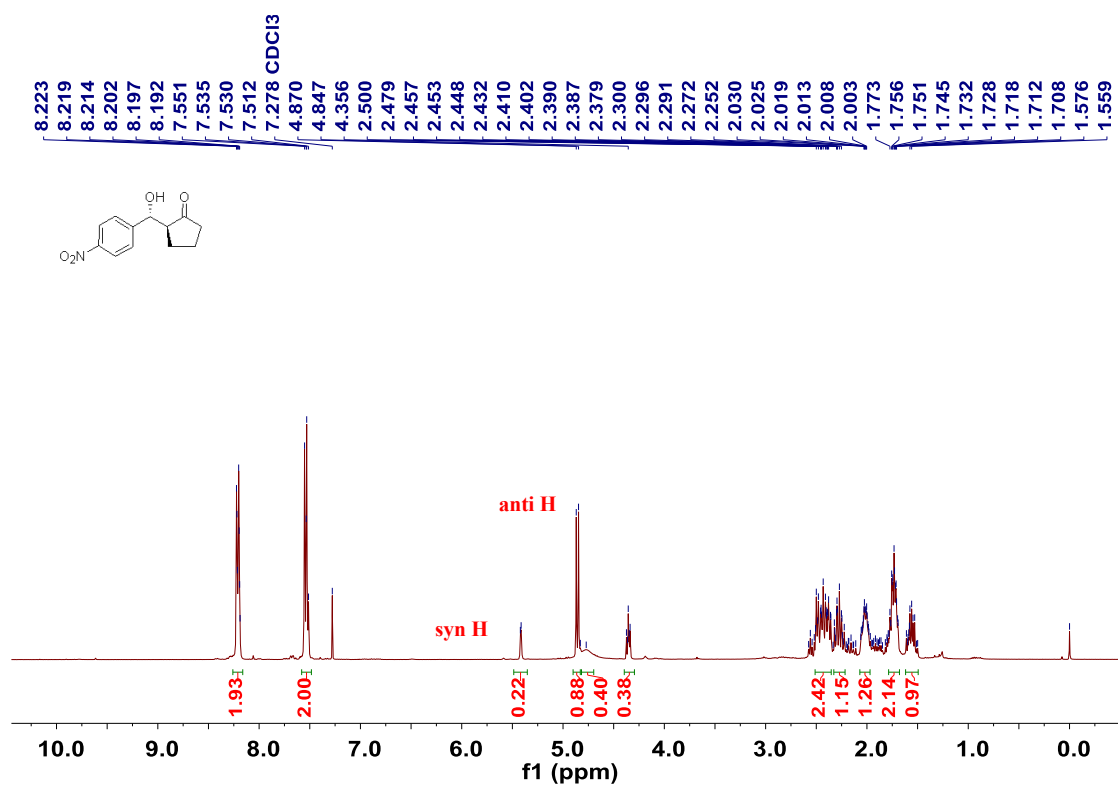

$^{13}\text{C}\{^1\text{H}\}$  NMR (101 MHz,  $\text{CDCl}_3$ )

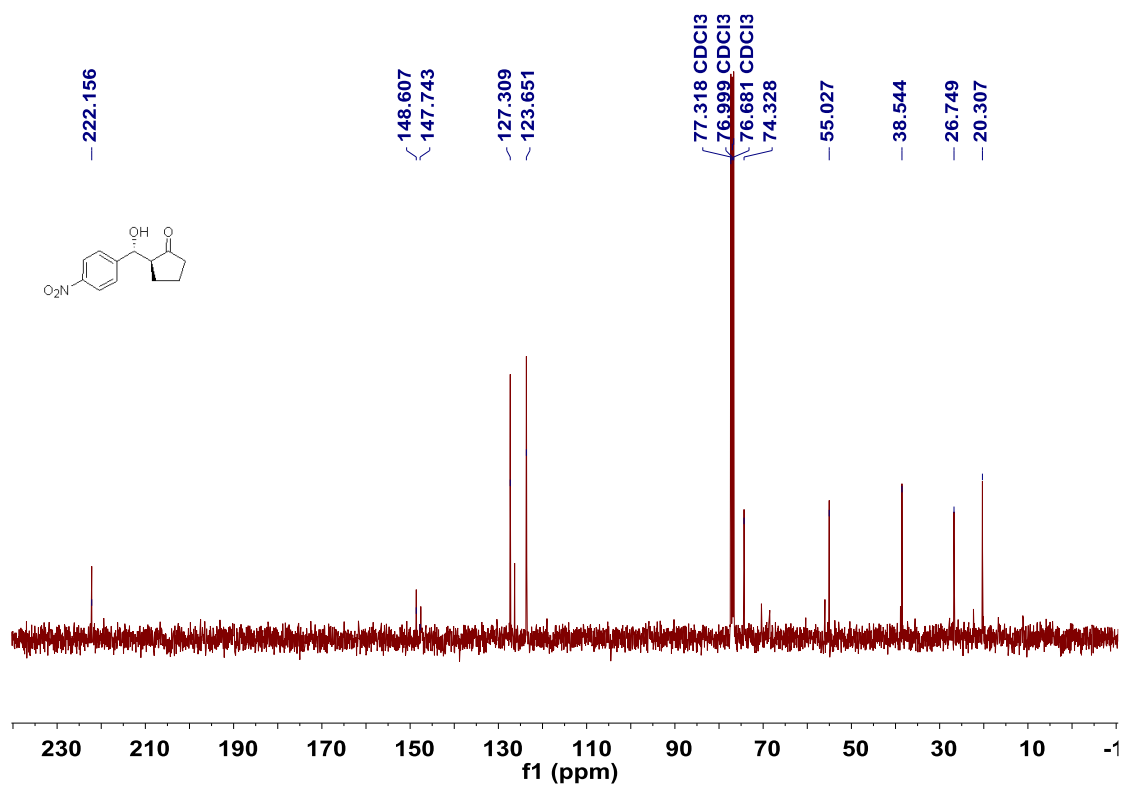

**(S)-2-((R)-Hydroxy(4-nitrophenyl)methyl)cyclohexan-1-one (5c)**

*anti:syn* = 94:6, ee of *anti* 90%

<sup>1</sup>H NMR (400 MHz, CDCl<sub>3</sub>)

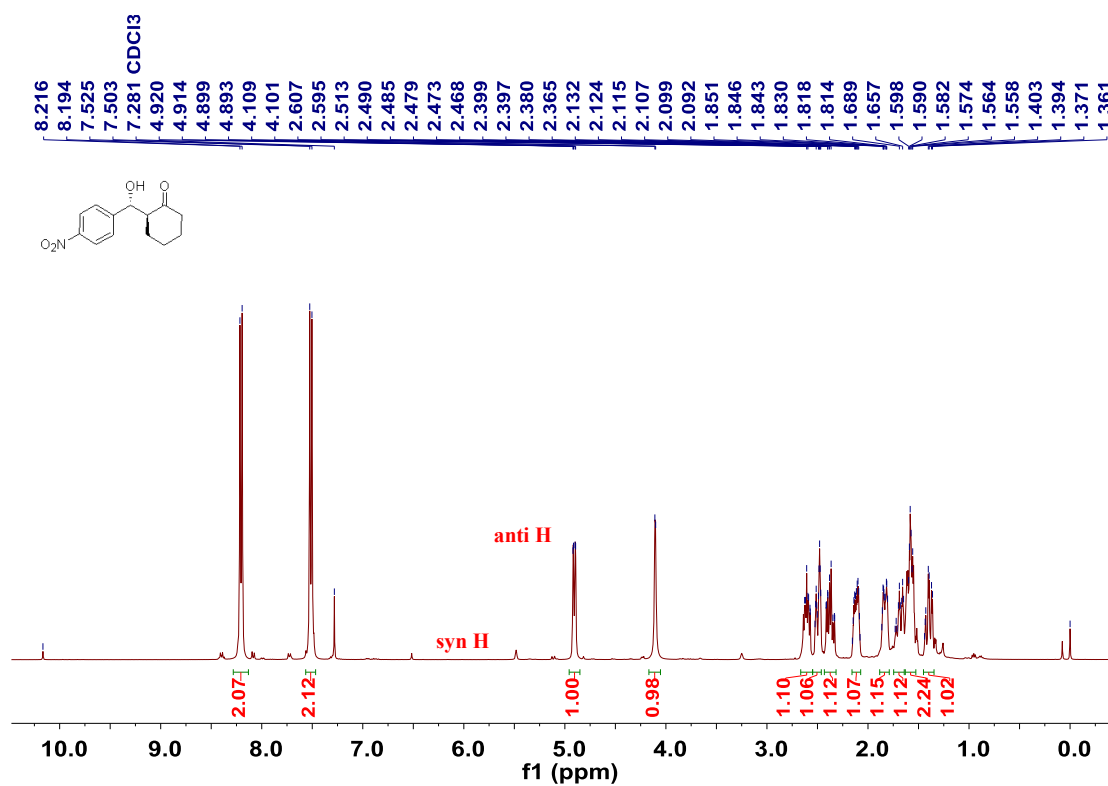

<sup>13</sup>C{<sup>1</sup>H} NMR (101 MHz, CDCl<sub>3</sub>)

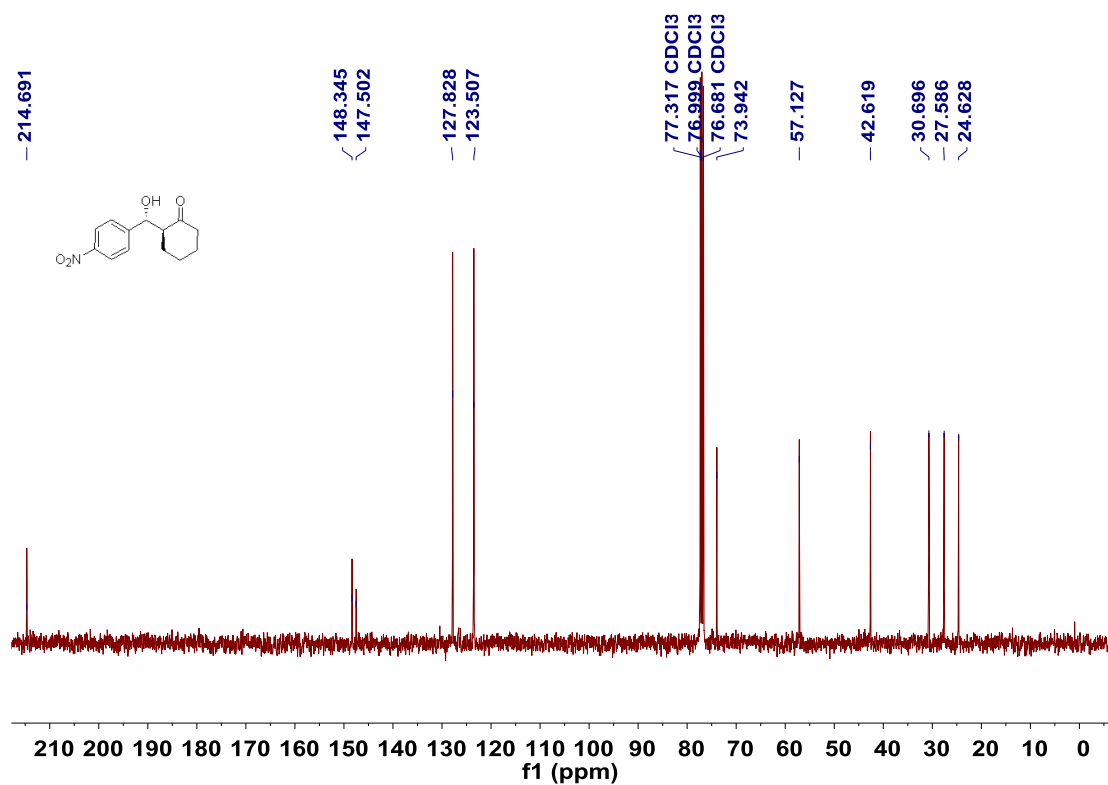

**(1*R*,2*S*)-Hydroxy-2-methyl-1-(4-nitrophenyl)pentan-3-one (5d)**

*anti:syn* = 86:14, ee of *anti* 98%.

<sup>1</sup>H NMR (400 MHz, CDCl<sub>3</sub>)

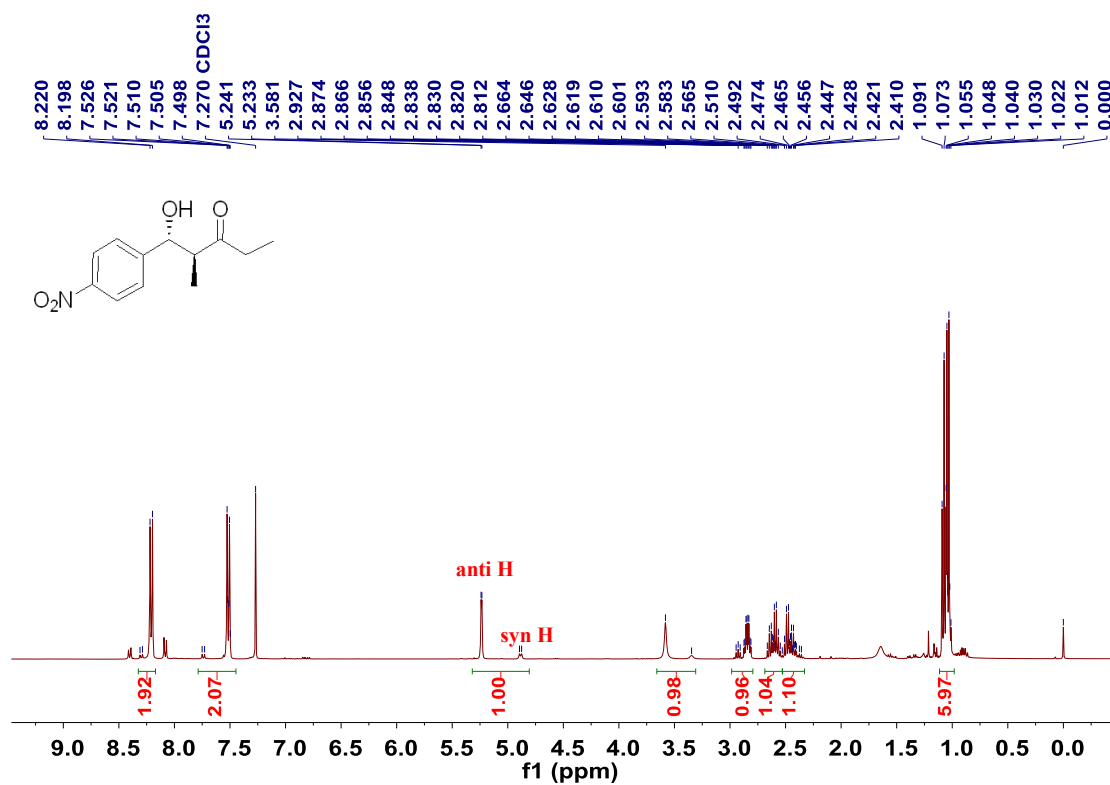

<sup>13</sup>C{<sup>1</sup>H} NMR (101 MHz, CDCl<sub>3</sub>)

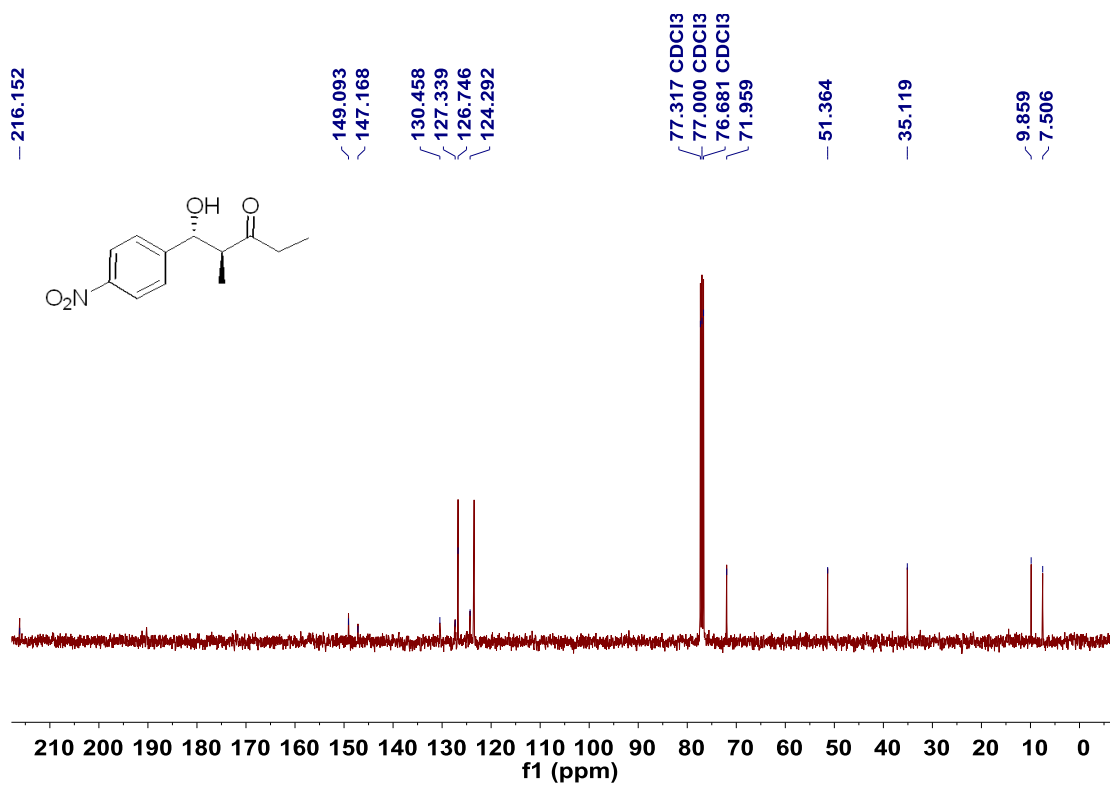

**(*R*)-3-Hydroxy-3-(4-nitrophenyl)-1-phenylpropan-1-one (5e)**

$^1\text{H}$  NMR (400 MHz,  $\text{CDCl}_3$ )

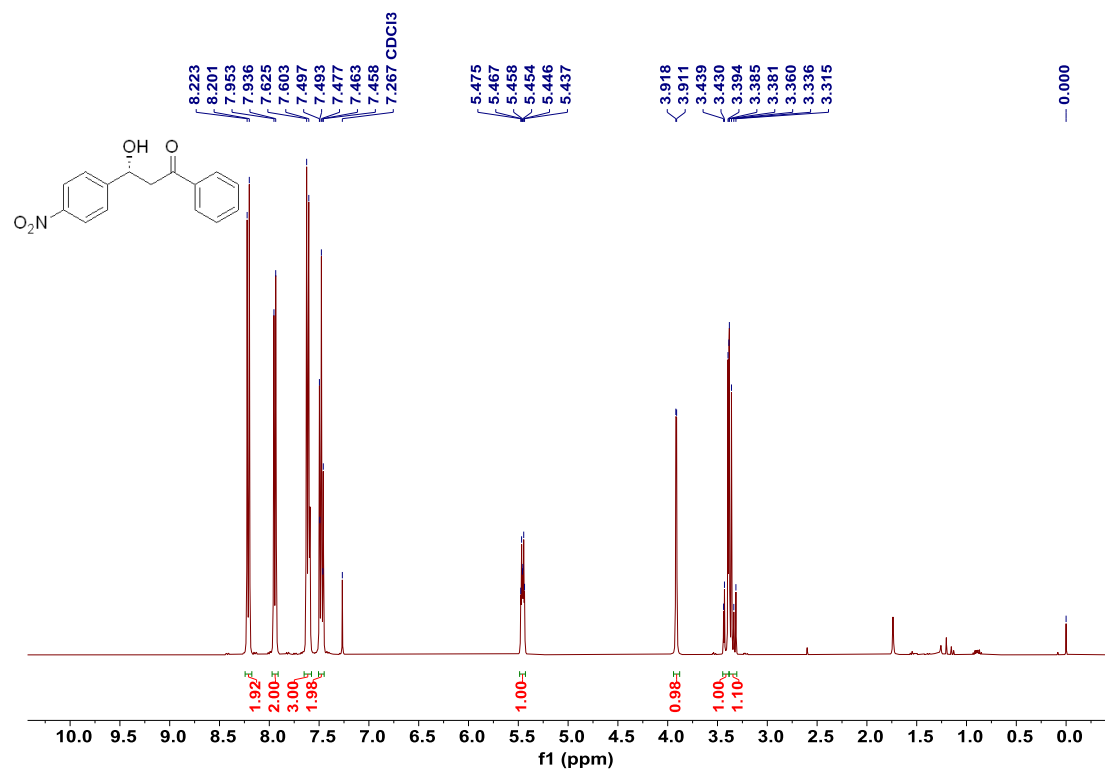

$^{13}\text{C}\{^1\text{H}\}$  NMR (101 MHz,  $\text{CDCl}_3$ )

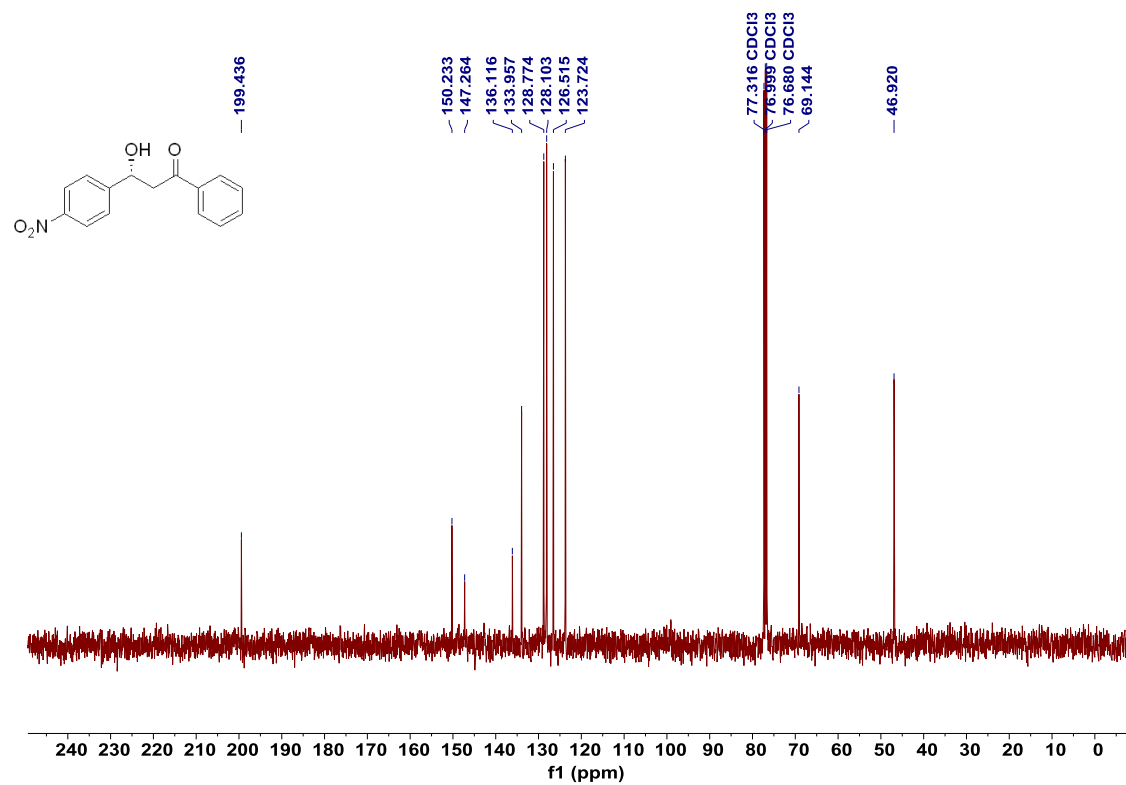

## Copies of HPLC profiles for the determination of enantiomeric excesses of aldol adducts

HPLC profiles for aldol adduct **3a**

**AS-H, *i*-PrOH/Hex 25/75, flow rate = 1.0 mL/min**

Racemic product

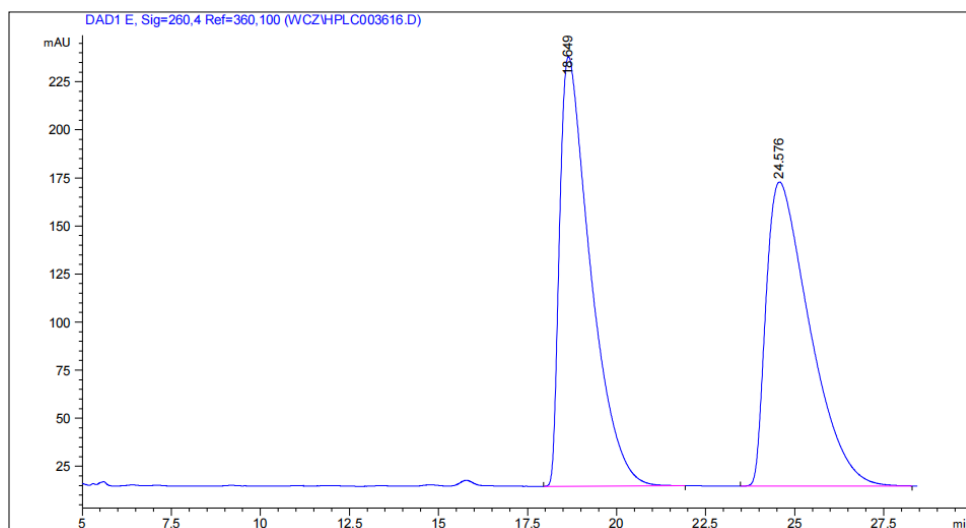

| Peak | Ret.Time<br>[min] | Type | Width [min] | Area[Mau*s] | Height [mAU] | Area%   |
|------|-------------------|------|-------------|-------------|--------------|---------|
| 1    | 18.649            | BB   | 0.8901      | 1.34473e4   | 223.45892    | 50.1105 |
| 2    | 24.576            | BB   | 1.2818      | 1.33880e4   | 158.11673    | 49.8895 |

Asymmetric catalytic product

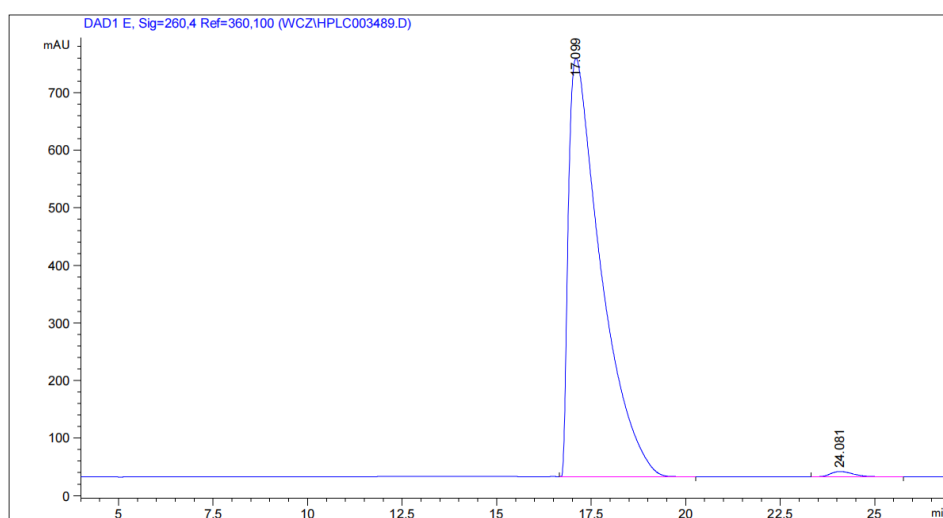

| Peak | Ret.Time<br>[min] | Type | Width [min] | Area[Mau*s] | Height [mAU] | Area%   |
|------|-------------------|------|-------------|-------------|--------------|---------|
| 1    | 17.099            | BB   | 0.8669      | 4.32646e4   | 726.36804    | 99.1429 |
| 2    | 24.081            | BB   | 0.6548      | 374.04776   | 9.03851      | 0.8571  |

# HPLC profiles for aldol adduct **3b**

**AD-H, *i*-PrOH/Hex 10/90, flow rate = 1.0 mL/min**

## Racemic product

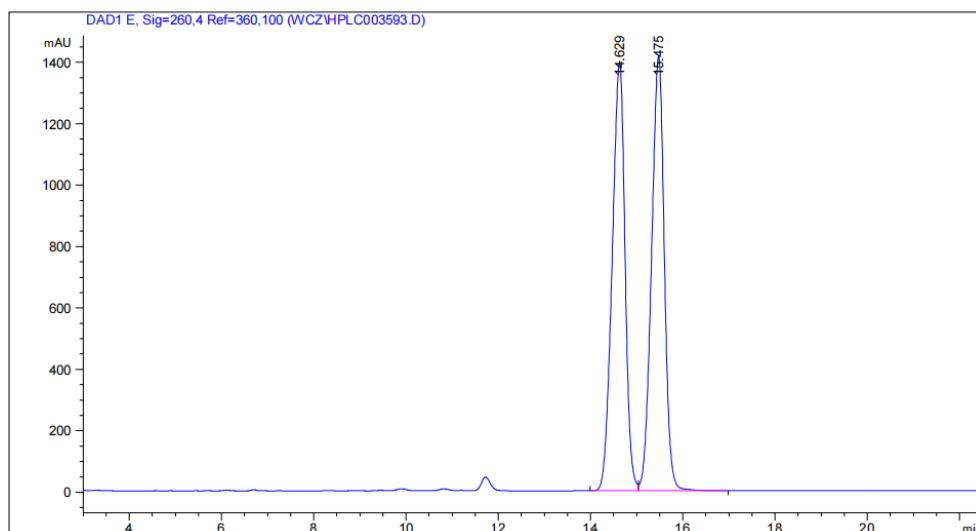

| Peak | Ret.Time<br>[min] | Type | Width [min] | Area[Mau*s] | Height [mAU] | Area%   |
|------|-------------------|------|-------------|-------------|--------------|---------|
| 1    | 14.629            | BV   | 0.2999      | 2.70145e4   | 1395.19458   | 49.7618 |
| 2    | 15.475            | VB   | 0.2973      | 2.72731e4   | 1412.34058   | 50.2382 |

## Asymmetric catalytic product

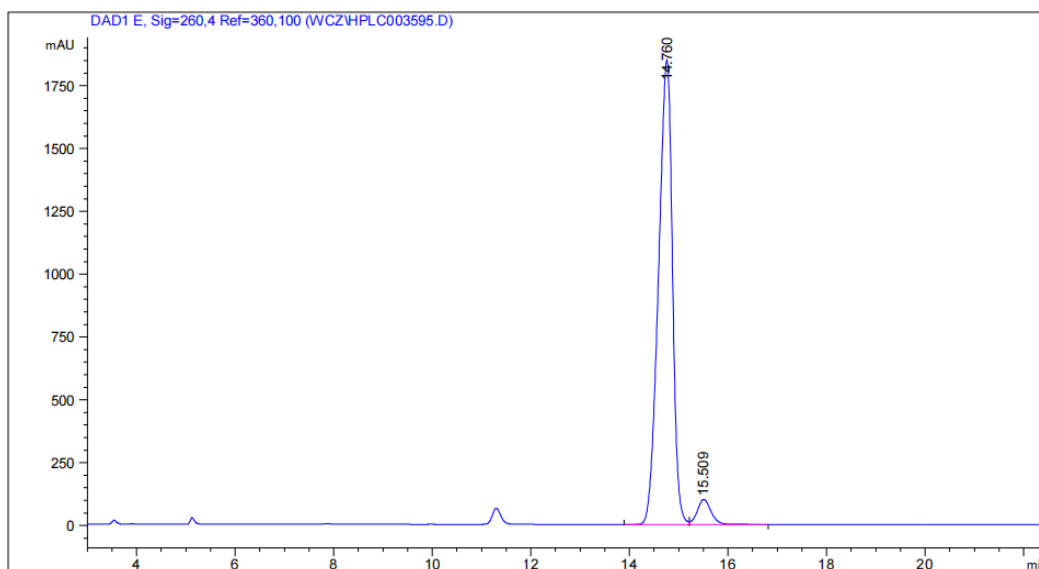

| Peak | Ret.Time<br>[min] | Type | Width [min] | Area[Mau*s] | Height [mAU] | Area%   |
|------|-------------------|------|-------------|-------------|--------------|---------|
| 1    | 14.760            | BV   | 0.3025      | 3.61705e4   | 1846.51892   | 94.9498 |
| 2    | 15.509            | VB   | 0.2985      | 1923.85486  | 99.10278     | 5.0502  |

HPLC profiles for aldol adduct **3c**

**AD-H, *i*-PrOH/Hex 5/95, flow rate = 1.0 mL/min**

Racemic product

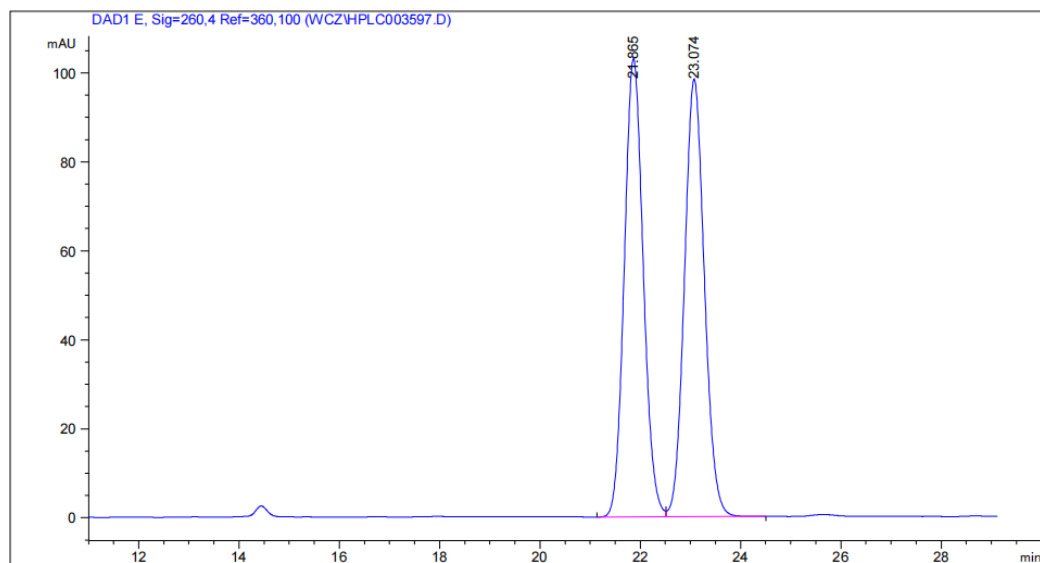

| Peak | Ret.Time<br>[min] | Type | Width [min] | Area[Mau*s] | Height [mAU] | Area%   |
|------|-------------------|------|-------------|-------------|--------------|---------|
| 1    | 21.865            | BV   | 0.4066      | 2706.45996  | 102.98327    | 49.9141 |
| 2    | 23.074            | VB   | 0.4282      | 2715.77759  | 98.34523     | 50.0859 |

Asymmetric catalytic product

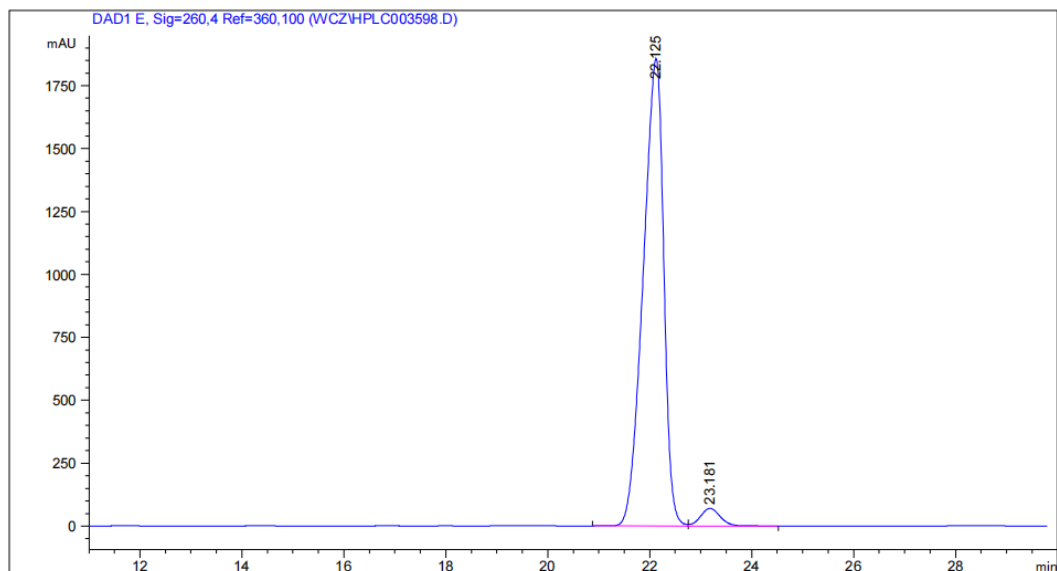

| Peak | Ret.Time<br>[min] | Type | Width [min] | Area[Mau*s] | Height [mAU] | Area%   |
|------|-------------------|------|-------------|-------------|--------------|---------|
| 1    | 22.125            | BV   | 0.4332      | 5.17262e4   | 1855.85608   | 96.5365 |
| 2    | 23.181            | VB   | 0.4114      | 1855.82910  | 69.96798     | 3.4635  |

# HPLC profiles for aldol adduct **3d**

**AS-H, *i*-PrOH/Hex 30/70, flow rate = 1.0 mL/min**

Racemic product

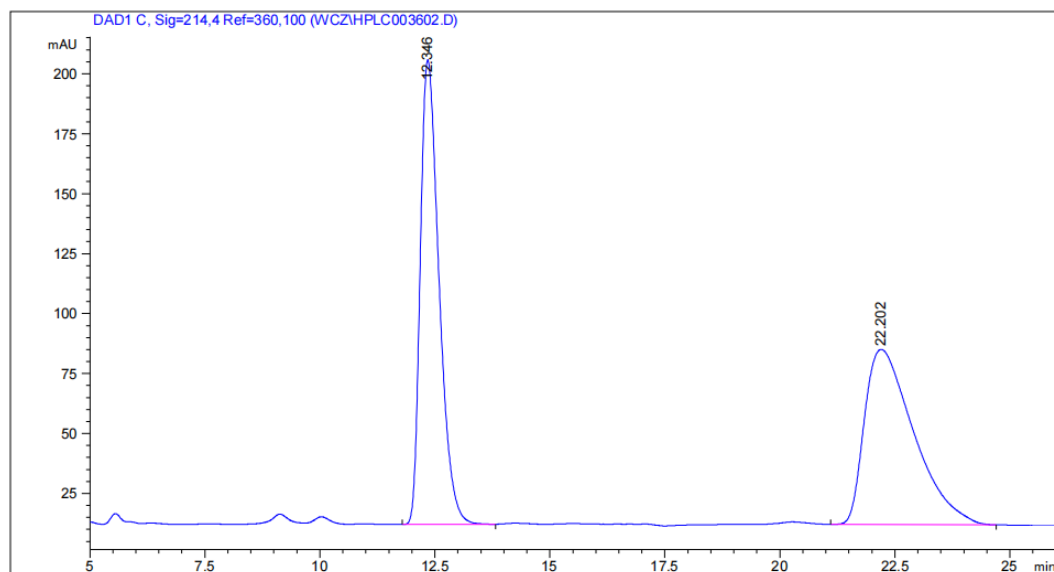

| Peak | Ret.Time<br>[min] | Type | Width [min] | Area[Mau*s] | Height [mAU] | Area%   |
|------|-------------------|------|-------------|-------------|--------------|---------|
| 1    | 12.346            | BB   | 0.4358      | 5477.55176  | 193.75621    | 50.1635 |
| 2    | 22.202            | BB   | 1.1516      | 5441.83789  | 73.00826     | 49.8365 |

Asymmetric catalytic product

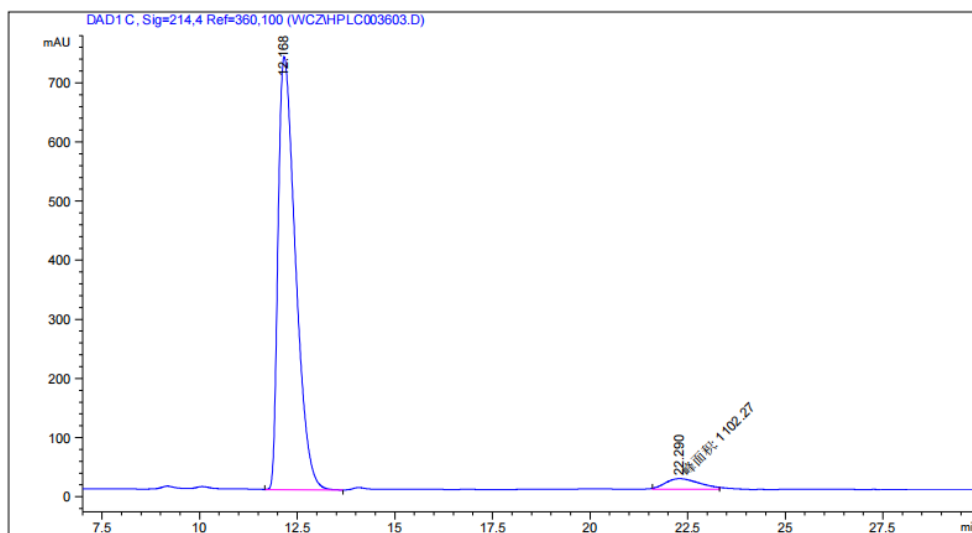

| Peak | Ret.Time<br>[min] | Type | Width [min] | Area[Mau*s] | Height [mAU] | Area%   |
|------|-------------------|------|-------------|-------------|--------------|---------|
| 1    | 12.168            | BB   | 0.4806      | 2.26214e4   | 731.97998    | 95.3537 |
| 2    | 22.290            | MM   | 1.0201      | 1102.26563  | 18.00859     | 4.6463  |



HPLC profiles for aldol adduct **3e**

**AS-H, *i*-PrOH/Hex 15/85, flow rate = 1.0 mL/min**

Racemic product

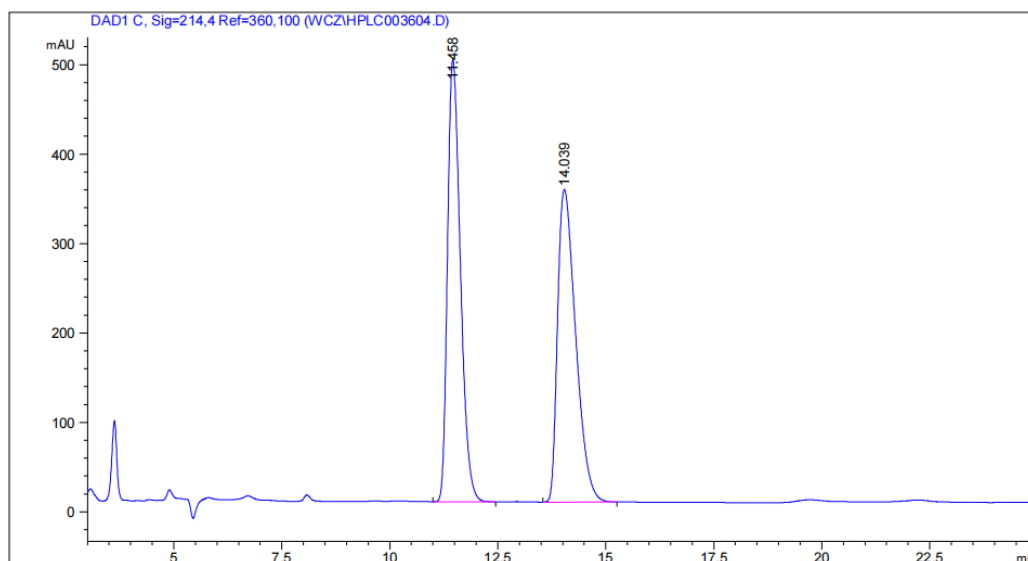

| Peak | Ret.Time<br>[min] | Type | Width [min] | Area[Mau*s] | Height [mAU] | Area%   |
|------|-------------------|------|-------------|-------------|--------------|---------|
| 1    | 11.458            | BB   | 0.3223      | 1.02650e4   | 494.34796    | 50.2015 |
| 2    | 14.039            | BB   | 0.4520      | 1.01826e4   | 349.38925    | 49.7985 |

Asymmetric catalytic product

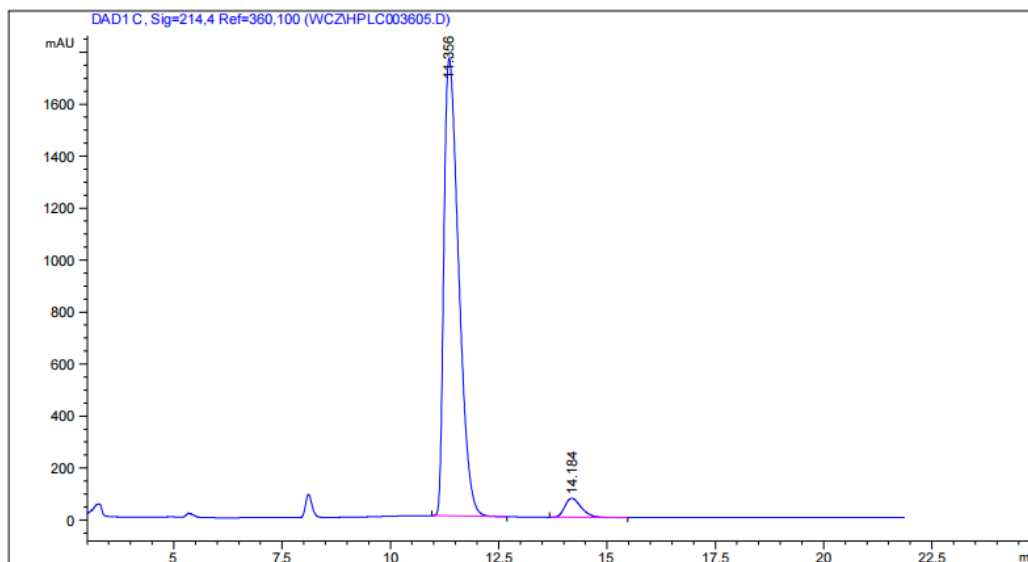

| Peak | Ret.Time<br>[min] | Type | Width [min] | Area[Mau*s] | Height [mAU] | Area%   |
|------|-------------------|------|-------------|-------------|--------------|---------|
| 1    | 11.356            | BB   | 0.3698      | 4.16144e4   | 1760.16138   | 95.5188 |
| 2    | 14.184            | BB   | 0.4105      | 1952.30200  | 73.84138     | 4.4812  |

HPLC profiles for aldol adduct **3f**

**AS-H, *i*-PrOH/Hex 20/80, flow rate = 1.0 mL/min**

Racemic product

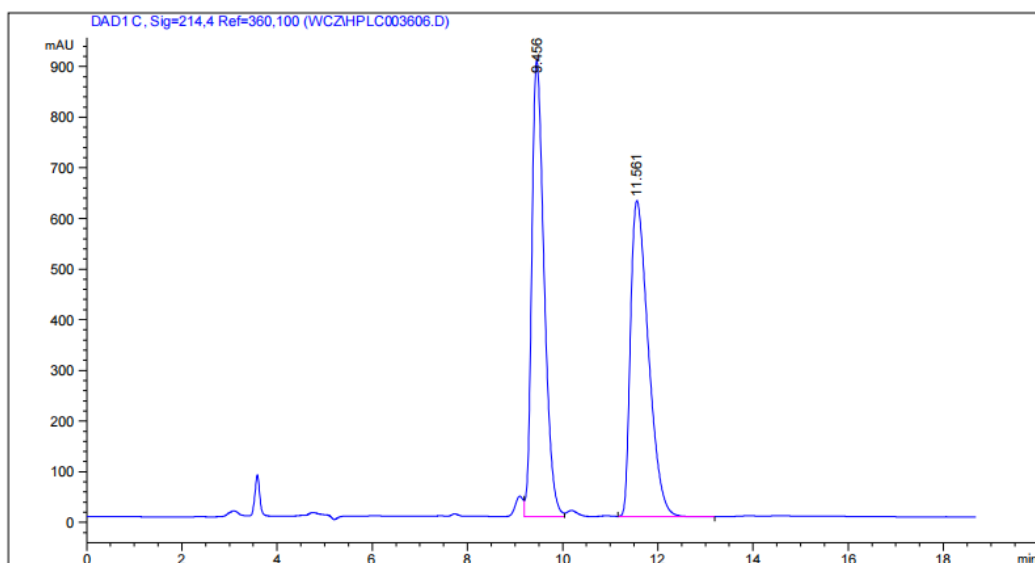

| Peak | Ret.Time<br>[min] | Type | Width [min] | Area[Mau*s] | Height [mAU] | Area%   |
|------|-------------------|------|-------------|-------------|--------------|---------|
| 1    | 9.456             | VV   | 0.2790      | 1.62858e4   | 900.60876    | 50.1054 |
| 2    | 11.561            | VB   | 0.4054      | 1.62173e4   | 623.52692    | 49.8946 |

Asymmetric catalytic product

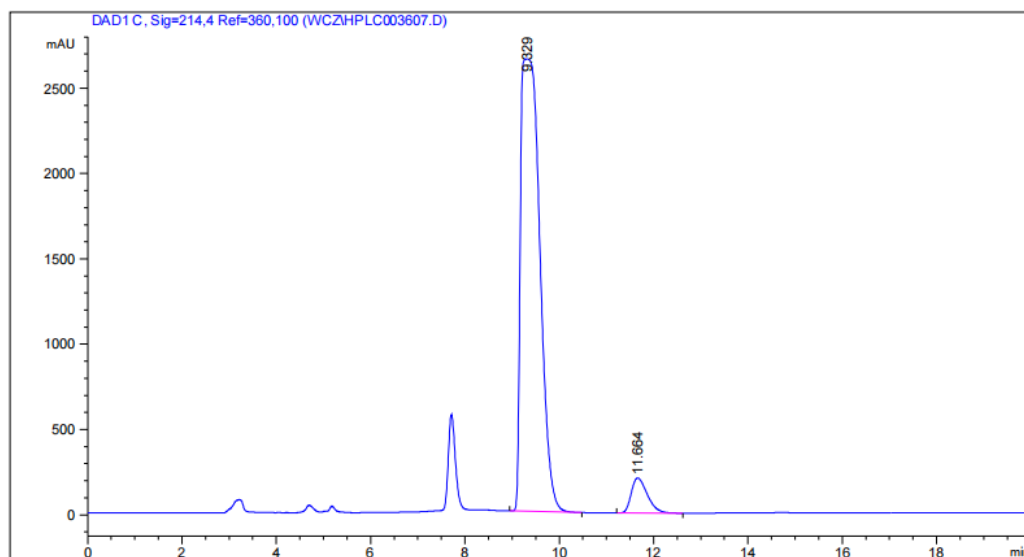

| Peak | Ret.Time<br>[min] | Type | Width [min] | Area[Mau*s] | Height [mAU] | Area%   |
|------|-------------------|------|-------------|-------------|--------------|---------|
| 1    | 9.329             | BB   | 0.4507      | 7.50985e4   | 2649.60815   | 93.9306 |
| 2    | 11.664            | BB   | 0.3654      | 4852.51123  | 205.55980    | 6.0694  |

HPLC profiles for aldol adduct **3j**

**AS-H, *i*-PrOH/Hex 15/85, flow rate = 1.0 mL/min**

Racemic product

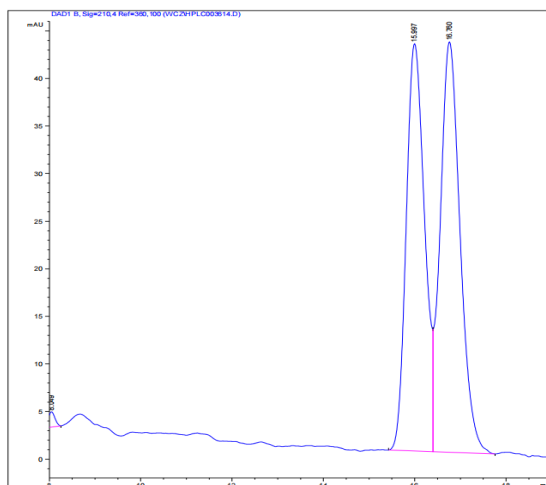

| Peak | Ret.Time<br>[min] | Type | Width [min] | Area[Mau*s] | Height [mAU] | Area%   |
|------|-------------------|------|-------------|-------------|--------------|---------|
| 1    | 15.997            | BV   | 0.4322      | 1189.07642  | 42.78967     | 47.5846 |
| 2    | 16.760            | VB   | 0.4585      | 1309.79163  | 43.10918     | 52.4154 |

Asymmetric catalytic product

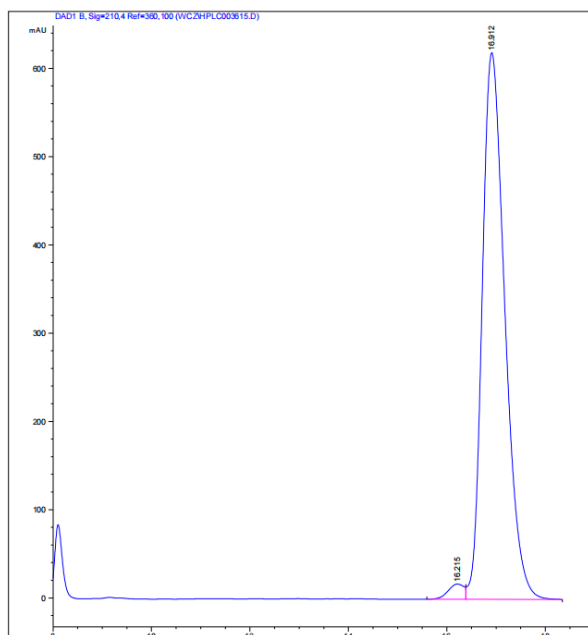

| Peak | Ret.Time<br>[min] | Type | Width [min] | Area[Mau*s] | Height [mAU] | Area%   |
|------|-------------------|------|-------------|-------------|--------------|---------|
| 1    | 16.215            | BV   | 0.3413      | 383.98489   | 17.27590     | 1.9076  |
| 2    | 16.912            | VBA  | 0.4940      | 1.97452e4   | 619.33215    | 98.0924 |

HPLC profiles for aldol adduct **3k**

**AS-H, *i*-PrOH/Hex 15/85, flow rate = 1.0 mL/min**

Racemic product

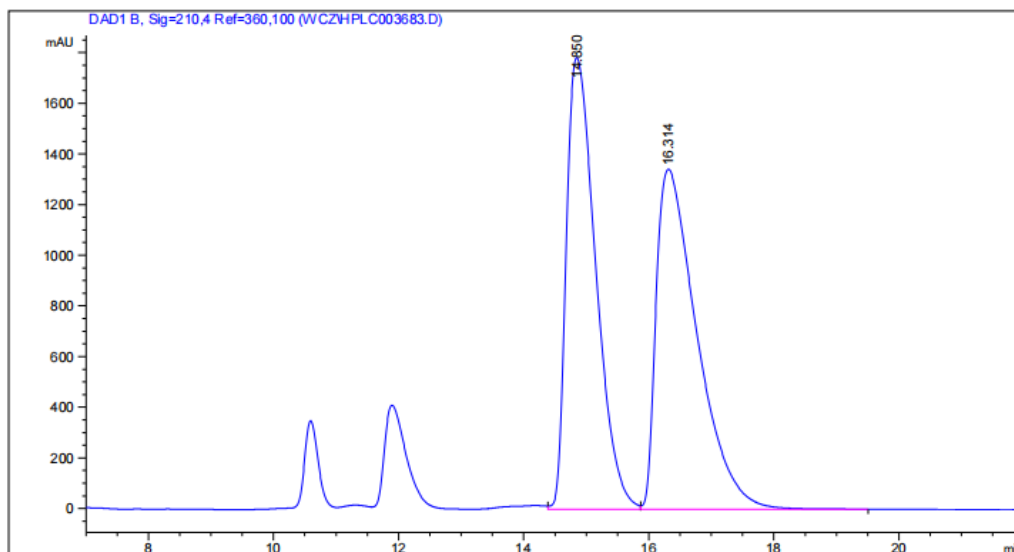

| Peak # | Ret.Time [min] | Type | Width [min] | Area[Mau*s] | Height [mAU] | Area%   |
|--------|----------------|------|-------------|-------------|--------------|---------|
| 1      | 14.850         | VV   | 0.5091      | 5.82311e4   | 1782.80029   | 48.8932 |
| 2      | 16.314         | VB   | 0.6909      | 6.08674e4   | 1342.58069   | 51.1068 |

Asymmetric catalytic product

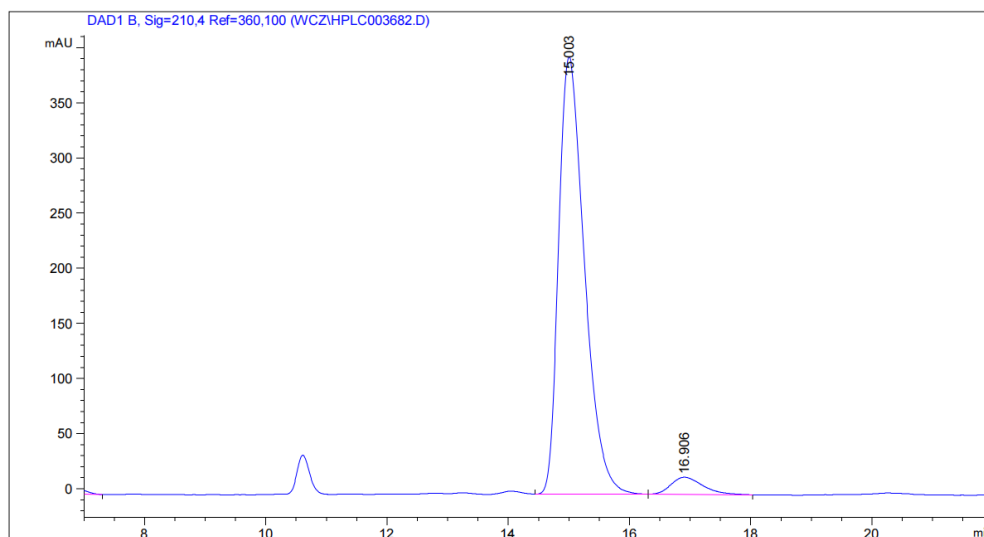

| Peak # | Ret.Time [min] | Type | Width [min] | Area[Mau*s] | Height [mAU] | Area%   |
|--------|----------------|------|-------------|-------------|--------------|---------|
| 1      | 15.003         | BB   | 0.4548      | 1.17161e4   | 396.42722    | 95.3548 |
| 2      | 16.906         | BB   | 0.5511      | 570.74664   | 15.59202     | 4.6452  |

HPLC profiles for aldol adduct **3l**

**OD-H, *i*-PrOH/Hex 20/80, flow rate = 1.0 mL/min**

Racemic product

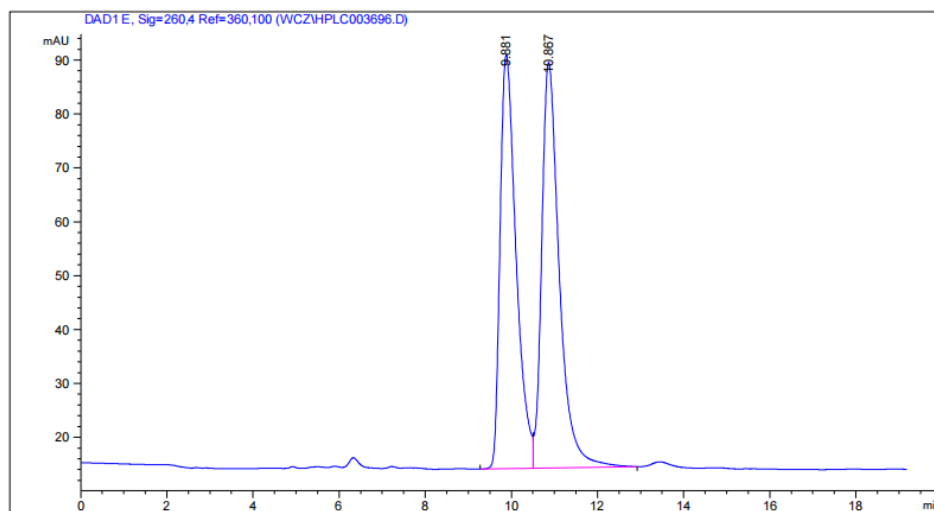

| Peak | Ret.Time<br>[min] | Type | Width [min] | Area[Mau*s] | Height [mAU] | Area%   |
|------|-------------------|------|-------------|-------------|--------------|---------|
| 1    | 9.881             | BV   | 0.3946      | 1979.20239  | 76.82684     | 48.1040 |
| 2    | 10.867            | VB   | 0.4289      | 2135.21973  | 75.29314     | 51.8960 |

Asymmetric catalytic product

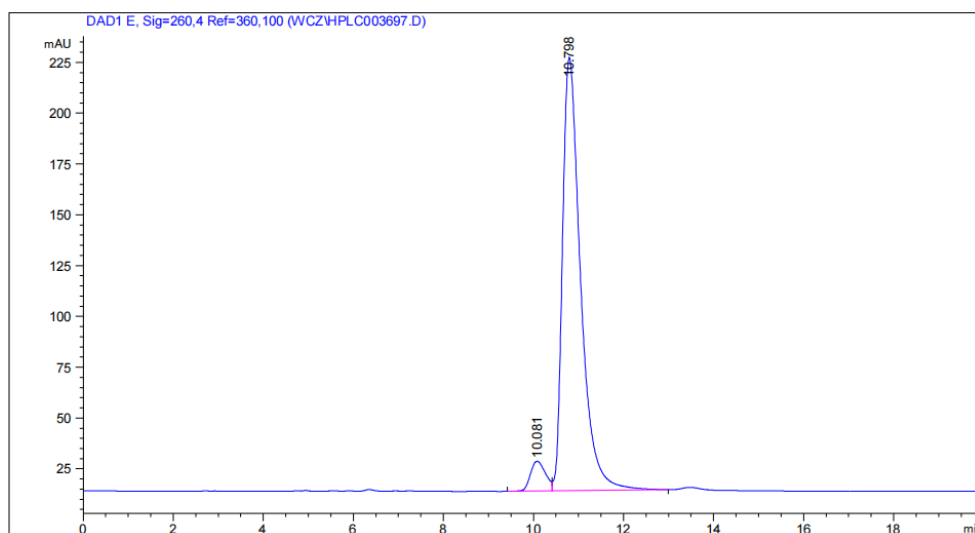

| Peak | Ret.Time<br>[min] | Type | Width [min] | Area[Mau*s] | Height [mAU] | Area%   |
|------|-------------------|------|-------------|-------------|--------------|---------|
| 1    | 10.081            | BV   | 0.3603      | 340.70801   | 14.70577     | 5.4165  |
| 2    | 10.798            | VB   | 0.4237      | 5949.44580  | 213.11494    | 94.5835 |

HPLC profiles for aldol adduct **3m**

AS-H, *i*-PrOH/Hex 40/60, flow rate = 1.0 mL/min\

Racemic product

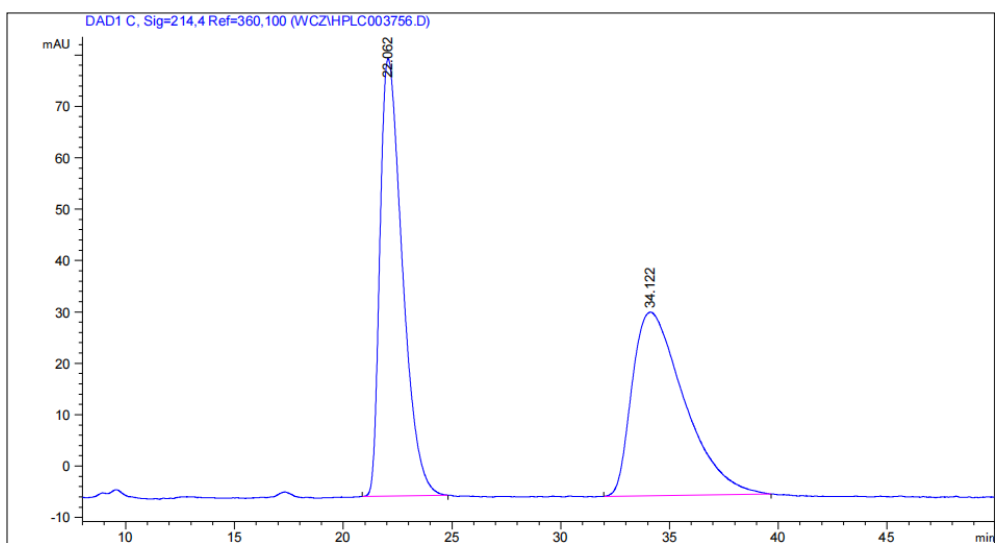

| Peak | Ret.Time<br>[min] | Type | Width [min] | Area[Mau*s] | Height [mAU] | Area%   |
|------|-------------------|------|-------------|-------------|--------------|---------|
| 1    | 22.062            | BB   | 1.0875      | 6099.33936  | 85.16624     | 50.5693 |
| 2    | 34.122            | BB   | 2.2783      | 5961.99902  | 35.73761     | 49.4307 |

Asymmetric catalytic product

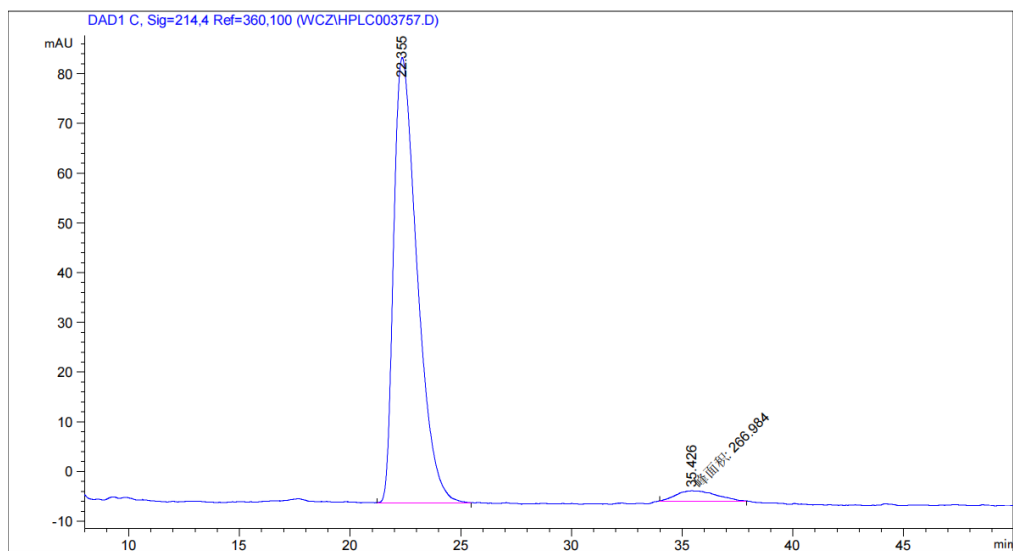

| Peak | Ret.Time<br>[min] | Type | Width [min] | Area[Mau*s] | Height [mAU] | Area%   |
|------|-------------------|------|-------------|-------------|--------------|---------|
| 1    | 22.355            | BB   | 1.1083      | 6585.91553  | 89.52574     | 96.1041 |
| 2    | 35.426            | MM   | 2.1153      | 266.98392   | 2.10360      | 3.8959  |

HPLC profiles for aldol adduct **3n**

AD-H, *i*-PrOH/Hex 10/90, flow rate = 1.0 mL/min

Racemic product

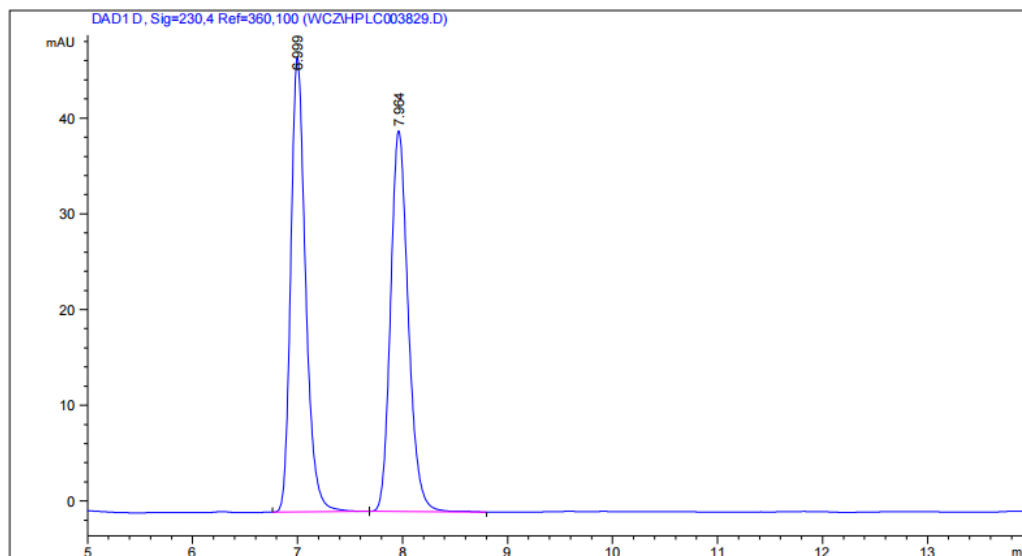

| Peak | Ret.Time<br>[min] | Type | Width [min] | Area[Mau*s] | Height [mAU] | Area%   |
|------|-------------------|------|-------------|-------------|--------------|---------|
| 1    | 6.999             | BB   | 0.1505      | 466.01334   | 47.47792     | 50.0646 |
| 2    | 7.964             | BB   | 0.1803      | 464.81012   | 39.77437     | 49.9354 |

Asymmetric catalytic product

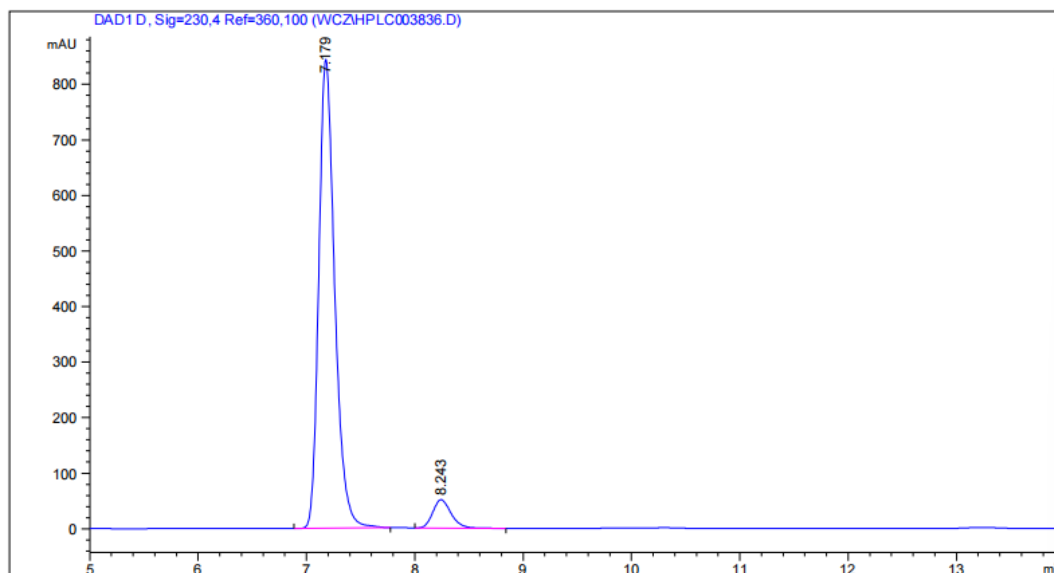

| Peak | Ret.Time<br>[min] | Type | Width [min] | Area[Mau*s] | Height [mAU] | Area%   |
|------|-------------------|------|-------------|-------------|--------------|---------|
| 1    | 7.179             | BB   | 0.1571      | 8608.34180  | 843.13580    | 93.4442 |
| 2    | 8.243             | BB   | 0.1819      | 603.93488   | 51.08908     | 6.5558  |

HPLC data for aldol adduct **5a**

AS-H, *i*-PrOH/Hex 10/90, flow rate = 1.0 mL/min

Racemic product

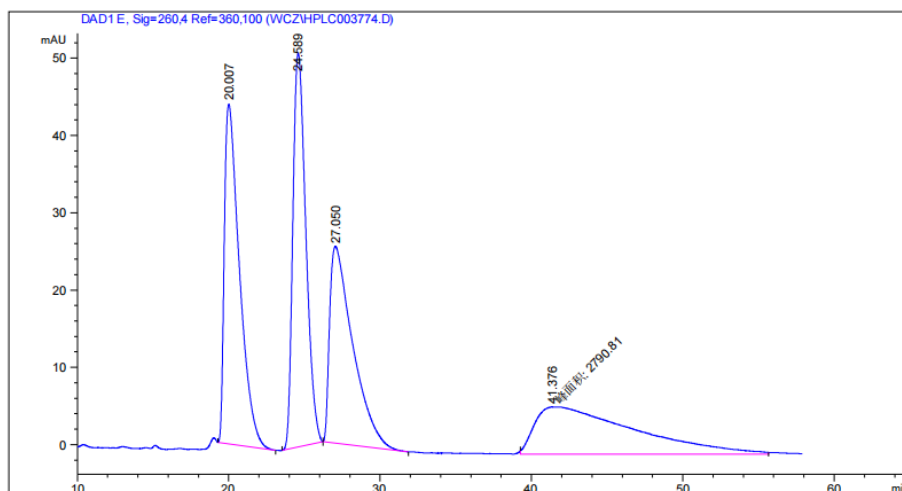

| Peak | Ret.Time<br>[min] | Type | Width [min] | Area[Mau*s] | Height [mAU] | Area%   |
|------|-------------------|------|-------------|-------------|--------------|---------|
| 1    | 20.007            | BB   | 1.0250      | 3055.15454  | 43.95235     | 26.3365 |
| 2    | 24.589            | BB   | 0.9270      | 3043.92041  | 50.95270     | 26.2396 |
| 3    | 27.050            | BB   | 1.4941      | 2710.58374  | 25.46068     | 23.3661 |
| 4    | 41.376            | MM   | 7.6034      | 2790.81372  | 6.11749      | 24.0578 |

Asymmetric catalytic product

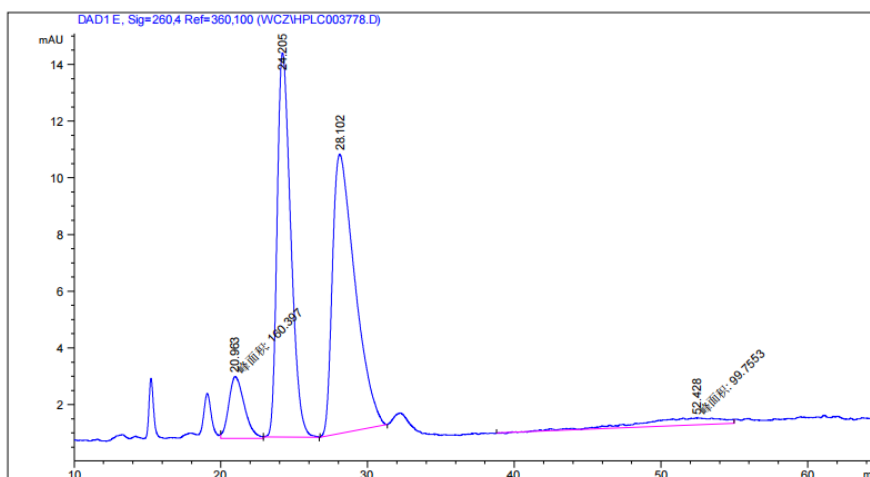

| Peak | Ret.Time<br>[min] | Type | Width [min] | Area[Mau*s] | Height [mAU] | Area%   |
|------|-------------------|------|-------------|-------------|--------------|---------|
| 1    | 20.963            | MM   | 1.2242      | 160.39726   | 2.18363      | 7.3259  |
| 2    | 24.205            | BB   | 0.9913      | 875.24530   | 13.55556     | 39.9757 |
| 3    | 28.102            | BB   | 1.4597      | 1054.04614  | 9.85575      | 48.1422 |
| 4    | 52.428            | MM   | 6.8675      | 99.75529    | 2.42095e-1   | 4.5562  |



HPLC data for aldol adduct **5b**

AS-H, *i*-PrOH/Hex 10/90, flow rate = 1.0 mL/min

Racemic product

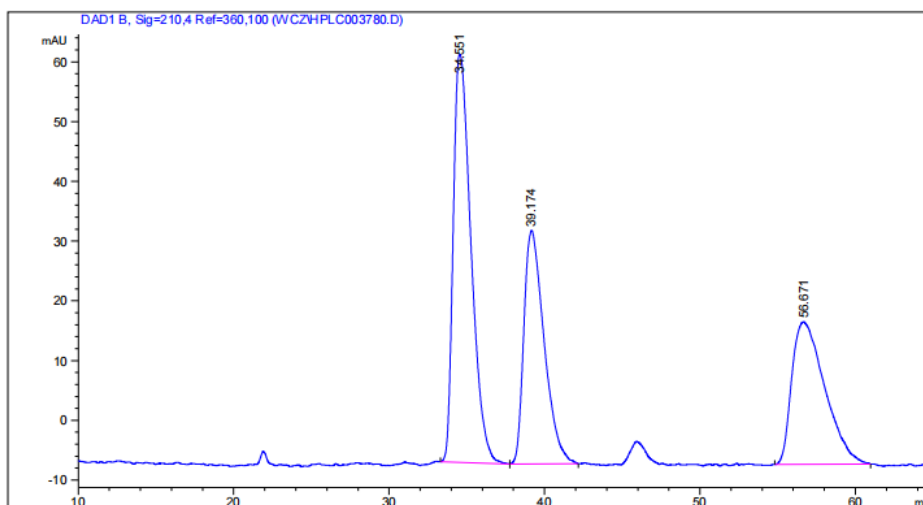

| Peak | Ret.Time<br>[min] | Type | Width [min] | Area[Mau*s] | Height [mAU] | Area%   |
|------|-------------------|------|-------------|-------------|--------------|---------|
| 1    | 34.551            | BB   | 1.2314      | 5425.05859  | 68.24712     | 43.4870 |
| 2    | 39.174            | BB   | 1.3514      | 3530.73657  | 39.10375     | 28.3022 |
| 3    | 56.671            | BB   | 1.8111      | 3519.33032  | 23.85674     | 28.2108 |

Asymmetric catalytic product

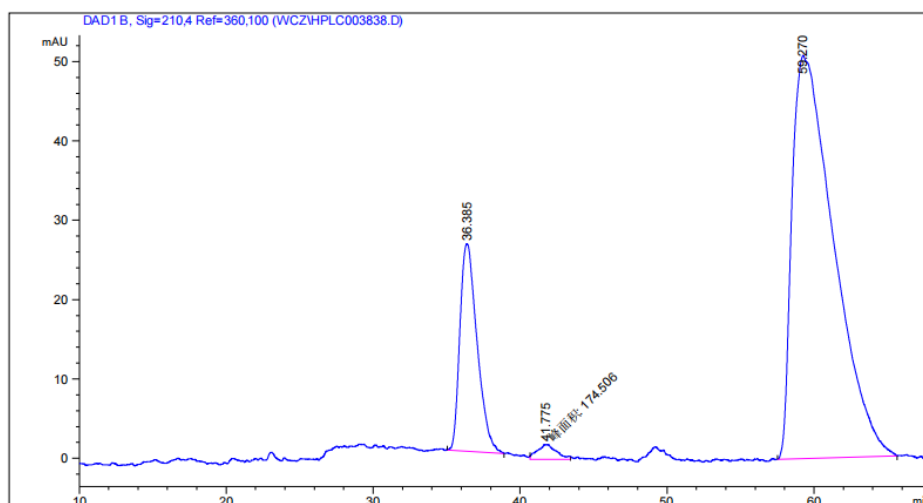

| Peak | Ret.Time<br>[min] | Type | Width [min] | Area[Mau*s] | Height [mAU] | Area%   |
|------|-------------------|------|-------------|-------------|--------------|---------|
| 1    | 36.385            | BB   | 1.1769      | 2126.15381  | 26.14150     | 17.2603 |
| 2    | 41.775            | MM   | 1.5256      | 174.50610   | 1.90643      | 1.4167  |
| 3    | 59.270            | BB   | 2.4061      | 1.00175e4   | 50.81232     | 81.3230 |

HPLC profiles for aldol adduct **5c**

**AS-H, *i*-PrOH/Hex 15/85, flow rate = 1.0 mL/min**

Racemic product

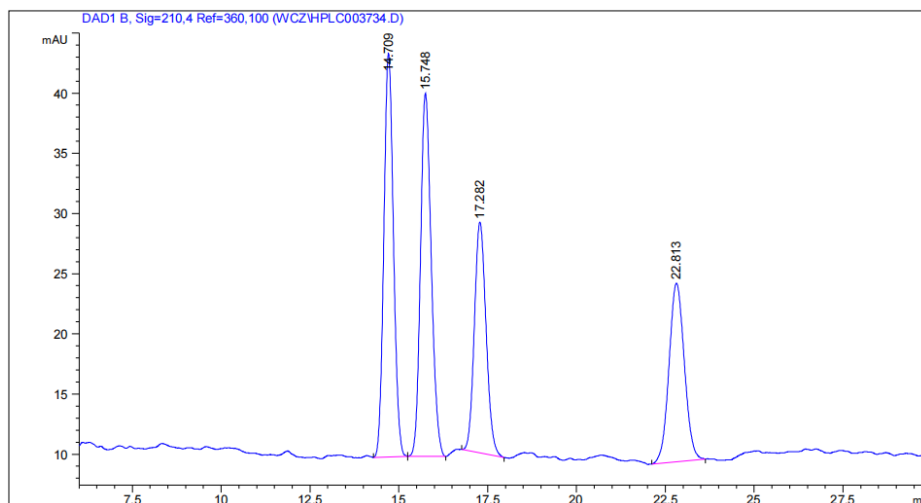

| Peak | Ret.Time<br>[min] | Type | Width [min] | Area[Mau*s] | Height [mAU] | Area%   |
|------|-------------------|------|-------------|-------------|--------------|---------|
| 1    | 14.709            | BB   | 0.2928      | 628.89124   | 33.53823     | 29.3203 |
| 2    | 15.748            | BB   | 0.3267      | 632.54614   | 30.15775     | 29.4907 |
| 3    | 17.282            | BB   | 0.3569      | 438.76962   | 19.17785     | 20.4564 |
| 4    | 22.813            | BB   | 0.4679      | 444.69247   | 14.82708     | 20.7326 |

Asymmetric catalytic product

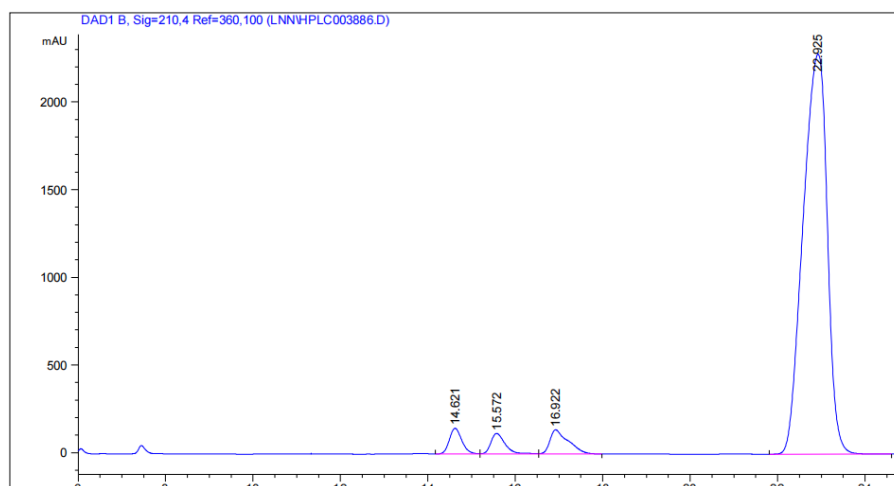

| Peak | Ret.Time<br>[min] | Type | Width [min] | Area[Mau*s] | Height [mAU] | Area%   |
|------|-------------------|------|-------------|-------------|--------------|---------|
| 1    | 14.621            | VV   | 0.3077      | 2945.36646  | 147.05167    | 3.0252  |
| 2    | 15.572            | VV   | 0.3461      | 2675.70361  | 117.29309    | 2.7483  |
| 3    | 16.922            | VB   | 0.4015      | 3989.55664  | 137.91690    | 4.0977  |
| 4    | 22.925            | BB   | 0.6328      | 8.77491e4   | 2281.23828   | 90.1287 |

HPLC profiles for aldol adduct (**5d**)

OJ-H, *i*-PrOH/Hex 10/90, flow rate = 1.0 mL/min

Racemic *anti*-**5d** and racemic *syn*-**5d**:

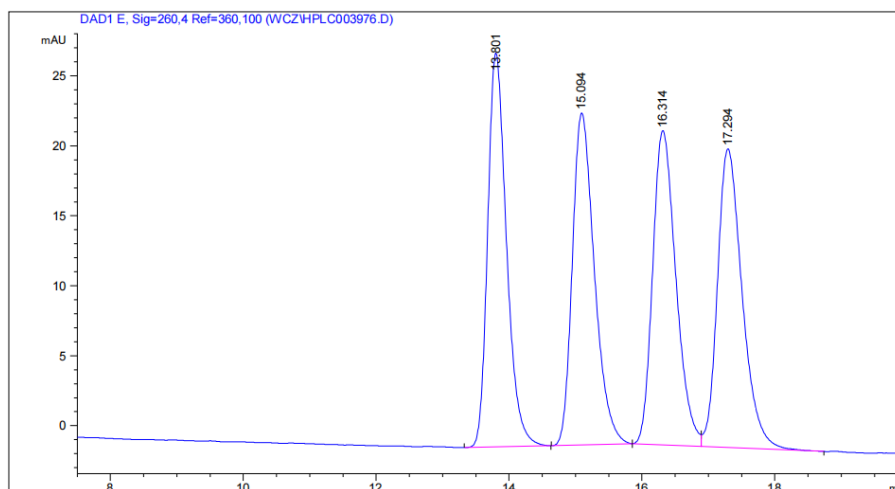

| Peak | Ret.Time<br>[min] | Type | Width [min] | Area[Mau*s] | Height [mAU] | Area%   |
|------|-------------------|------|-------------|-------------|--------------|---------|
| 1    | 13.801            | BB   | 0.3014      | 553.18799   | 28.13572     | 25.1730 |
| 2    | 15.094            | BB   | 0.3529      | 546.69916   | 23.71664     | 24.8778 |
| 3    | 16.314            | BV   | 0.3736      | 545.82788   | 22.45365     | 24.8381 |
| 4    | 17.294            | VB   | 0.3936      | 551.82733   | 21.34453     | 25.1111 |

Racemic *anti*-**5d** with a small amount of *syn*-**5d**:

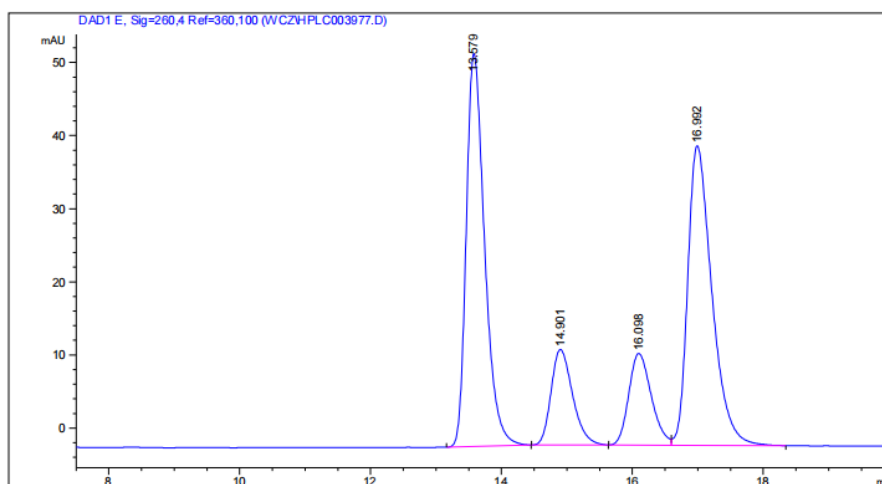

| Peak | Ret.Time<br>[min] | Type | Width [min] | Area[Mau*s] | Height [mAU] | Area%   |
|------|-------------------|------|-------------|-------------|--------------|---------|
| 1    | 13.579            | BB   | 0.2965      | 1042.11133  | 53.68844     | 38.7866 |
| 2    | 14.901            | BB   | 0.3527      | 298.44476   | 13.05601     | 11.1079 |
| 3    | 16.098            | BV   | 0.3686      | 299.20520   | 12.53092     | 11.1362 |
| 4    | 16.992            | VB   | 0.3902      | 1047.01843  | 40.96402     | 38.9693 |

Racemic *syn*-**5d**:

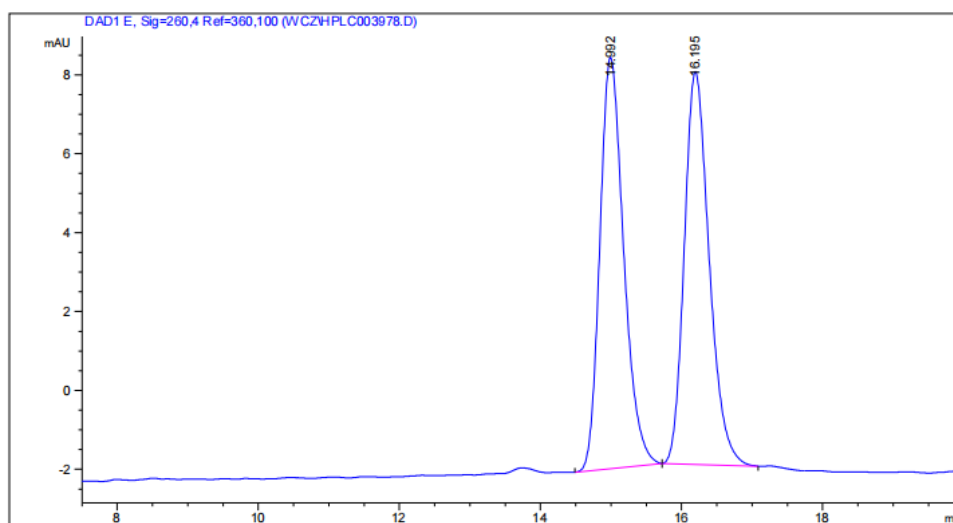

| Peak | Ret.Time<br>[min] | Type | Width [min] | Area[Mau*s] | Height [mAU] | Area%   |
|------|-------------------|------|-------------|-------------|--------------|---------|
| 1    | 14.992            | BB   | 0.3594      | 244.35245   | 10.42561     | 50.0852 |
| 2    | 16.195            | BB   | 0.3754      | 243.52147   | 9.95371      | 49.9148 |

Asymmetric catalytic product

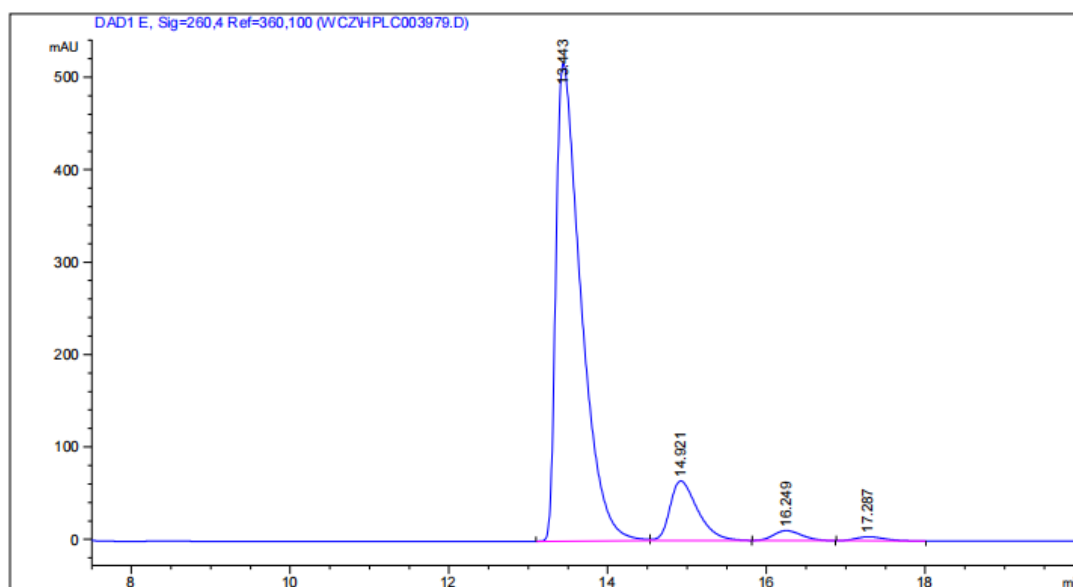

| Peak | Ret.Time<br>[min] | Type | Width [min] | Area[Mau*s] | Height [mAU] | Area%   |
|------|-------------------|------|-------------|-------------|--------------|---------|
| 1    | 13.443            | BV   | 0.3249      | 1.12988e4   | 517.08978    | 85.3837 |
| 2    | 14.921            | VB   | 0.3686      | 1565.74036  | 64.64348     | 11.8321 |
| 3    | 16.249            | BB   | 0.3818      | 260.27567   | 10.70069     | 1.9669  |
| 4    | 17.287            | BB   | 0.3872      | 108.15789   | 4.33398      | 0.8173  |

HPLC profiles for aldol adduct (**5e**)

**OJ-H, *i*-PrOH/Hex 10/90, flow rate = 1.0 mL/min**

Racemic product

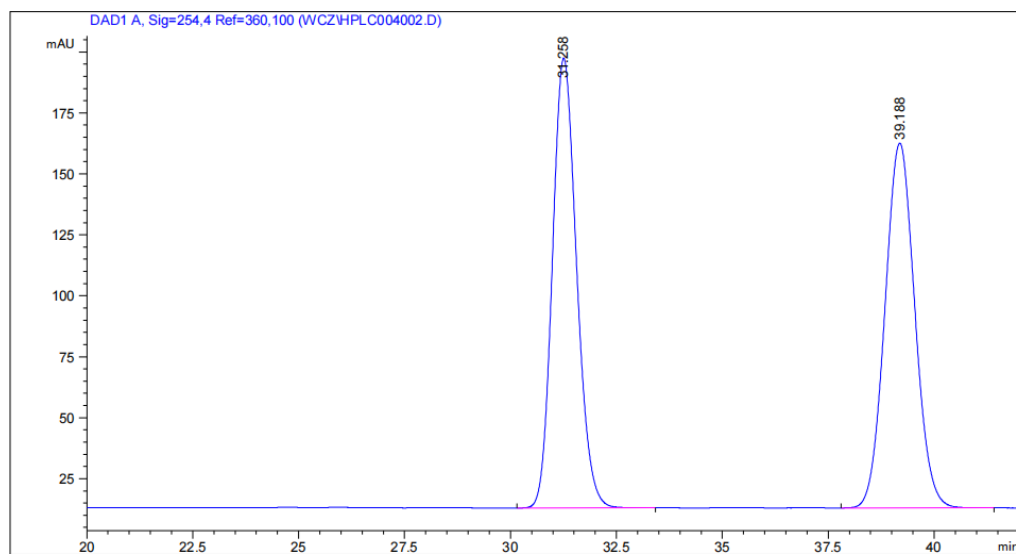

| Peak | Ret.Time<br>[min] | Type | Width [min] | Area[Mau*s] | Height [mAU] | Area%   |
|------|-------------------|------|-------------|-------------|--------------|---------|
| 1    | 31.258            | BB   | 0.6162      | 7306.41553  | 184.43570    | 50.0056 |
| 2    | 39.188            | BB   | 0.7657      | 7304.77148  | 149.60014    | 49.9944 |

Asymmetric catalytic product

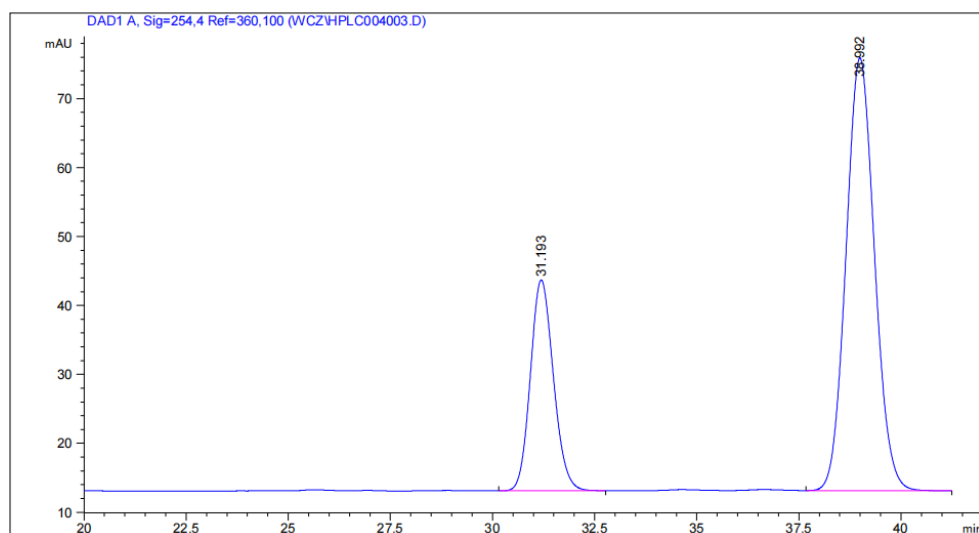

| Peak | Ret.Time<br>[min] | Type | Width [min] | Area[Mau*s] | Height [mAU] | Area%   |
|------|-------------------|------|-------------|-------------|--------------|---------|
| 1    | 31.193            | BB   | 0.6071      | 1198.12854  | 30.57926     | 28.2643 |
| 2    | 38.992            | BBA  | 0.7553      | 3040.88281  | 62.76026     | 71.7357 |
